# Supplementary material for: Construction and Characterization of Single-Chain Variable Fragment Antibody Library Derived from Germline Rearranged Immunoglobulin Variable Genes
Source: PLoS One. 2011 Nov 11;6(11):e27406. doi: 10.1371/journal.pone.0027406 (PMC3214059; doi:10.1371/journal.pone.0027406)
Supplement: Table S6 — Germline V-minigene Usage. (XLS) [file pone.0027406.s007.xls]

## Sheet: anti-phOx derived from Lib03
Re-analysis of anti-phOx scFv derived from scFv Lib03
Analysis based on VBASE2 (www.vbase2.org)
(A) Ig VH sequence of Lib03 anti-phOx clones
Name	nt seq (5'->3')	V-seg Alignment	D-seg Alignment	J-seg Alignment	P&N Junction Analysis	CDR Analysis	Ig Gene ORF	CDR1	CDR2	CDR3
>L3H11A-VH	CAGGTGAAGCTTGAGGAGCAGAGCTTGTGAAGCCAGGGGCCTCAGTCAAGTTGTCCTGCACAGCTTCTGGCTTCAACATTAAAGACACCTATATGCACTGGGTGAAGCAGAGGCCTGAACAGGGCCTGGAGTGGATTGGAAGGATTGATCCTGCGAATGGTAATACTAAATATGACCCGAAGTTCCAGGGCAAGGCCACTATAACAGCAGACACATCCTCCAACACAGCCTACCTGCAGCTCAGCAGCCTGACATCTGGGGACACTGCCGTCTATTACTGTGCCTCTAACCGAGACTGGTTTGCGCTATGGGGCCCAGGAACTCTGCTCACAGTCTCTTCA	V segment of the Igh-VSM7 VH14 family	DQ52a.1,DSP2.10, IGHD6-1*02	JH3, JH2, JH1		Stop codon found in the V gene!	5->3 Frame 3, xGEA*GAELVKPGASVKLSCTASGFNIKDTYMHWVKQRPEQGLEWIGRIDPANGNTKYDPKFQGKATITADTSSNTAYLQLSSLTSGDTAVYYCASNRDWFALWGPGTLLTVSS	GFNIKDTY....	IDPANGNT..	ASNRDWFAL			Unknown
>L3A8B-VH	CAGGTGCAGCTTGTGGAGTCTGGATCATGCCGCGAACAGAGATCTTGCGGAGCCGGAGCCCGCCCCTGCGAGGACCGCGCTGCAATCTGGGGATGATGCCGCTGCCGCAGAGCCATTTGCTGAAGACTCCTGTGCCGCCAGACCGCCAGCATTGCCTGCTCGCATCCCAGCACTGGCCAGTCTGAGCCGCAGCCCGGCATCGCCGCTGGTGCGCTTCCAGCTGCCCAACGTGCTGTTCGCCTACGCTCATACTCTCGCCCTGTATCGCGCATGGGGCGAAGGGACTTCTCTCACTGTCTCCTCA	unknown											No End of CDR3
>L3B10B-VH	CAGGTGATGCTGGTGGAGGAGGCTTGGTGCAACCTGGAGGATCCATGAAACTCTCCTGTGTTGCCTCTGGATTCACTTTCAGTAACTACTGGATGAACTGGGTCCGCCAGTCTCCAGAGAAGGGGCTTGAGTGGGTTGCTGAAATTAGATTGAAATCTAATAATTATGCAACACATTATGCGGAGTCTGTGAAAGGGAGGTTCACCATCTCAAGAGATGATTCCAAAAGTAGTGTCTACCTGCAAATGAACAACTTAAGAGCTGAAGACACTGGCATTTATTACTGTACCAGGAACTACACTCACTGTCTCCGCA	V segment of the Igh-VJ606 VH6 family	The D segment was not found	JH4, JH2, JH3	No end of CDR3 found!	No end of CDR3 found!	5->3 Frame 3, xGDAGGGGLVQPGGSMKLSCVASGFTFSNYWMNWVRQSPEKGLEWVAEIRLKSNNYATHYAESVKGRFTISRDDSKSSVYLQMNNLRAEDTGIYYCTRNYTHCLR	GFTFSNYW....	IRLKSNNYAT	TRNYTHCLR			Probably due to primer degeneracy
>L3A6C-VH	CAGGTGATGCTGCTGCAGGCTTGGTGCAACCTGGAGGATCCATGAAACTCTCCTGTGTTGCCTCTGGATTCACTTTCAGTAACTACTGGATGAACTGGGTCCGCCAGTCTCCAGAGAAGGGGCTTGAGTGGGTTGCTGAAATTAGATTGAAATCTAATAATTATGCAATACATTATGCGGAGTCTGTGAAAGGGAGGTTCACCATCTCAAGAGATGATTCCAAAAGTAGTGTCTACCTGCAAATGAACAACTTAAGAGCTGAAGACACTGGCATTTATTACTGTACCAGGAGGAACTGGTACTTCGGGGTTTGGGGCCAAGGGACCCCTCTCACTGTCTCTGCA	V segment of the Igh-VJ606 VH6 family	The D segment was not found	JH1 mouse, JH1B6 mouse, JH2 mouse			5->3 Frame 3, xGDAAAGLVQPGGSMKLSCVASGFTFSNYWMNWVRQSPEKGLEWVAEIRLKSNNYAIHYAESVKGRFTISRDDSKSSVYLQMNNLRAEDTGIYYCTRRNWYFGVWGQGTPLTVS	GFTFSNYW....	IRLKSNNYAI	TRRNWYFGV			Ok
>L3A9C-VH	GAGTGATGCTGCTGGAGGAGGCTTGGTGCAACCTGGAGGATCCATGAAACTCTCCTGTGTTGCCTCTGGATTCACTTTCAGTAACTACTGGATGAACTGGGTCCGCCAGTCTCCAGAGAAGGGGCTTGAGTGGGTTGCTGAAATTAGATTGAAACCTAATAATTATGCAACACATTATGCGGAGTCTGTGAAAGGGAGGTTCACCATCTCAAGAGATGATTCCAAAAGTAGTGTCTACCTGCAAATGAACAACTTAAGAGCTGAAGACACTGGCATTTATTACTGTACCAGGCCCGGCTATAGGTACGACCGGCATACTGGGGCCCAGGCACCTCGGTCACTGTCTCCTCA	V segment of the Igh-VJ606 VH6 family	DSP2.11, IGHD2-14*01, DSP2.10	JH4, JH3, JH2	No end of CDR3 found!	No end of CDR3 found!	5->3 Frame 2, xSDAAGGGLVQPGGSMKLSCVASGFTFSNYWMNWVRQSPEKGLEWVAEIRLKPNNYATHYAESVKGRFTISRDDSKSSVYLQMNNLRAEDTGIYYCTRPGYRYDRHTGAQAPRSLSPx	GFTFSNYW	IRLKPNNYAT	TRPGYRYDRHTGAQAPRSLSPx			?
>L3B5C-VH	CAGGTGCTGCTGCTGGAGTAGTCTGGAGGAGGCTTGGTGCAACCTGGAGGATCCATGAAACTCTCTTGTGCTGCCTCTGGATTCACTTTTAGTGACGCCTGGATGGACTGGGTCCGCCAGTCTCCAGAGAAGGGGCTTGAGTGGGTTGCTGAAATTAGAAGCAAAGCTAATAATCACGCAACATACTATGCTGAGTCTGTAAAAGGGAGGTTCACCATCTCAAGAGATGATTCCAAAAGTAGTGTCTACCTGCAAATGAACAGCTTAAGAGCTGAAGACACTGGCATTTATTACTGTACCAGGCACCCCGGTCACCGTCTCCGCA	V segment of the Igh-VJ606 VH6 family	The D segment was not found	JH1 mouse, JH1B6 mouse, JH3 mouse	No end of CDR3 found!	Stop codon found in the V gene! No end of CDR3 found!	5->3 Frame 1, VLLLE*SGGGLVQPGGSMKLSCAASGFTFSDAWMDWVRQSPEKGLEWVAEIRSKANNHATYYAESVKGRFTISRDDSKSSVYLQMNSLRAEDTGIYYCTRHPGHRLR	GFTFSDAW....	IRSKANNHAT	TRHPGHRLR
>L3C4C-VH	GAGGTGCTGCTGGAGCAGAGCTTGTGAGGTCAGGGGCCTCAGTCAAGTTGTCCTGCACAGCTTCTGGCTTCAACATAAAAGACTACTATATGCACTGGGTGAAGCAGAGGCCTGAACAGGGCCTGGAGTGGATTGGATGGATTGATCCTGAGAATGGTGATACTGAATATGCCCCGAAGTTCCAGGGCAAGGCCACTATGACTGCAGACACATCCTCCAACACAGCCTACCTGCAGCTCAGCAGCCTGACATCTGAGGACACTGCCGTCTATTACTGTAATGCCCCCTTTTATGATGGTTAACCCCTTGTTTGCTGGCTGGGGTCAAGGAACTCTGCTCACTGTCTCCTCA	V segment of the Igh-V15 VH15 family	PseudoD3, DSP2.9, DSP2.3	JH3, JH2, JH1	Out of frame rearrangement!	Stop codon found in the CDR3 region! Out of frame rearrangement!	5->3 Frame 3, xGAAGAELVRSGASVKLSCTASGFNIKDYYMHWVKQRPEQGLEWIGWIDPENGDTEYAPKFQGKATMTADTSSNTAYLQLSSLTSEDTAVYYCNAPFYDG*PLVCWLGSRNSAHCL	GFNIKDYY....	IDPENGDT..	NAPFYDG*PLVCWLGSRNSAHCL
>L3C6C-VH	GAGGTGCTGCTGGTGCAGCTGCAGGAGTCTGGACCTGAGaCTGGTGAAGaCCTGGGaCTtCAGCTGAAGATGTCCTGaCAAGCCTTCTGGTTACTCATTTCACTGACTACTTTATGAACTGGGTGAAGCAGAGCCATGGAAAGAGCCTtGACTGGATTGGACGTATCCACCTCCTCTACAATGGTGATACTTCTCTACAACCAGAAGTTCAAGGGCAAGGCCACATTGACTGTAAACAAATCCTCTAGCACAGCCCACATGGAGCTCCGGAGCCTGACATCTGAGGACTCTGCAGTCTATTATTGTGCAAGAGTATATGCTATGGACTACTGGGGTCAAgGGAACTATGCTCACAGTCTCGCA	V segment of the Igh-VJ558 VH1 family	The D segment was not found	JH4, JH2, JH3		Stop codon found in the V gene!	5->3 Frame 1, LQESGPETGEDLGLQLKMS*QAFWLLISLTTL*TG*SRAMERALTGLDVSTSSTMVILLYNQKFKGKATLTVNKSSSTAHMELRSLTSEDSAVYYCARVYAMDYWGQGN	LISLTTL*....	TSSTMVIL..	ARVYAMDY
>L3D5C-VH	CAGGTGCTGCTTGTGGAGTCTGGAGTGGAAAGCAGCAAGACAGCAAACGTTCTGGAGGCTGGAAATGAGTACGTGCACAGGACAAGGATACCACAGTGACAGCAAAGCCCCAAGGGTGAGGTTACTCTGCGAGAAGGTGGACTCTCATGCACCCACGCACCTGGTTCTAAAGGCTTGTCCATATCCCCGTTGACACAAGGCCTGTGACTGGCCACACTGTTAGGTTCCGTGGTGGGCTGCAGGAGCAGGTTGCTGAAAGTGGGAGCCAGTCGGAAGCAGCGCTTGGTCTGGAACATCTGGGTGGACATGGCTTGTAAATTGCTGGCAATGCTTGCTTCACTGGGGCGAGGGACCTCAGTCACAGTCTCTGCA	unknown
>L3D11C-VH	GAGTGAAGCTGGAGCAGTCTGGACCTGAGCTGGTGAAGCCTGGGGCTTCAGTGAAGATATCCTGCAAGGCTTCTGGTTACTCATTTACTGGCTACTTTATGAACTGGGTGATGCAGAGCCATGGAAAGAGCCTTGAGTGGATTGGACGTATTAATCCTTACAATGGTGATACTTTCTACAACCAGAAGTTCAAGGGCAAGGCCACATTGACTGTAGACAAATCCTCTAGCACAGCCCACATGGAGCTCCGGAGCCTGGCATCTGAGGACTCTGCAGTCTATTATTGTGCAAGAGTGGGGGTACGCAACTACTTTGACATCTGGGGTCCAGGCACCTCAGTCACTGTCTCCGCA	V segment of the Igh-VJ558 VH1 family	IGHD2-14*01, DSP2.10, DSP2.11	JH2, JH1, JH4			5->3 Frame 3, xVKLEQSGPELVKPGASVKISCKASGYSFTGYFMNWVMQSHGKSLEWIGRINPYNGDTFYNQKFKGKATLTVDKSSSTAHMELRSLASEDSAVYYCARVGVRNYFDIWGPGTSVTVSA	GYSFTGYF....	INPYNGDT..	ARVGVRNYFDI
>L3E2C-VH	CAGGTGCAGCTGGACCAGAGCTTGTGAGGTCAGGGGCCTCAGTCAAGTTGTCCTGCACAGCTTCTGGCTTCAACATTAAAGACTACTATATGCACTGGGTGAAGCAGAGGCCTGAACAGGGCCTGGAGTGGATTGGATGGATTGATCCTGAGAATGGTGATACTGAATATGCCCCGAAGTTCCAGGGCAAGGCCACTATGACTGCAGACACATCCTCCAACACAGCCTACCTGCaGCTCAGCAGCCTGACATCTGAGGACACTGCCGTCTATTACTGTAGTGGTGGGGCGAAGGAACCTCTCTCACTGTCTCTGCA	V segment of the Igh-V15 VH15 family	The D segment was not found	JH4, JH2, JH3	No end of CDR3 found!	No end of CDR3 found!	5->3 Frame 3, xGAAGPELVRSGASVKLSCTASGFNIKDYYMHWVKQRPEQGLEWIGWIDPENGDTEYAPKFQGKATMTADTSSNTAYLQLSSLTSEDTAVYYCSGGAKEPLSLS	GFNIKDYY....	IDPENGDT..	SGGAKEPLSLS
>L3E4C-VH	CAGGTGCTGCTGCAGGAGCAGAGCTTGTGAAGCCAGGGGCCTCAGTCAAGTTGTCCTGCACAGCTTCTGGCTTCAACATTAAAGACACCTATATGCATTGGGTGAAGCAGAGGCCTGAACAGGGCCTGGAGTGGATTGGAAGGATTGATCCTGCGAATGGTAATACTAAATATGACCCGAAGTTCCAGGGCAAGGCCACTATAACAGCAGACACATCCTCCAACACAGCCTACCTGCAGCTCAGCAGCCTGACATCTGAGGACACTGCCGTCTATTACTGTGCTAGAACGGATTACCCCTTCTATGCTATGGTCGTGGGGTGGAGGAACTACACTCACCGTCTCCTCA	V segment of the Igh-VSM7 VH14 family	DSP2.7, DFL16.1e, DSP2.4	JH4, JH2, JH1	Out of frame rearrangement!	Out of frame rearrangement!	5->3 Frame 3, xGAAAGAELVKPGASVKLSCTASGFNIKDTYMHWVKQRPEQGLEWIGRIDPANGNTKYDPKFQGKATITADTSSNTAYLQLSSLTSEDTAVYYCARTDYPFYAMVVGWRNYTHRLL	GFNIKDTY....	IDPANGNT..	ARTDYPFYAMVVGWRNYTHRLL
>L3E6C-VH	GAGGTGCAGCTTAAGGAGGCTTGGTGCAACCTGGAGGATCCATGAAACTCTCCTGTGTTGCCTCTGGATTCACTTTCAGTAACTACTGGATGAACTGGGTCCGCCAGTCTCCAGAGAAGGGGCTTGAGTGGGTTGCTGAAATNAGATTGAAATCTAATAATTATGCAACACATTATGCGGAGTCTGTGAAAGGGAGGTTCACCATCTCAAGAGATGATTCCAAAAGTAGTGTCTACCTGCAAATGAACAACTTAAGAGCTGAAGACACTGGCATTTATTACTGTACCAGGAGGAACTGGTACTTCGATTACTGGGGCGAAGGgCACCCCTCTCACTGTCTCCTCA	V segment of the Igh-VJ606 VH6 family	The D segment was not found	JH1 mouse, JH2 mouse, JH1B6 mouse		Stop codon found in the V gene!	5->3 Frame 3, xGAA*GGLVQPGGSMKLSCVASGFTFSNYWMNWVRQSPEKGLEWVAExRLKSNNYATHYAESVKGRFTISRDDSKSSVYLQMNNLRAEDTGIYYCTRRNWYFDYWGEG	GFTFSNYW....	xRLKSNNYAT	TRRNWYFDY
>L3G7c-VH	GAGGTGCTGCTTAAGGAGGCTTGGTGCAACCAGGAGGACCCATGAAACTCTCCTGTGTTGCCTCTGGATTCACTTTCAGTAACTACTGGATGAGCTGGGTCCGCCAGTCTCCAGAGAAGGGGCTTGAGTGGGTTGCTGAAATTAGATTGAAATCTAATAATTATGCAACACATTATGCGGAGTCTGTGAAAGGGAGGTTCACCATCTCAGGAGATGATTCCAAAAGTAGTGTCTACCTGCAAATGAACAGCTTAAGAGCTGAAGACACTGGCATTTATTACTGTACCAGGGACTATGGTTACGACGGCGACTGGGGCGCAGGGACCTCGCTCACAGTCTCTGCA	V segment of the Igh-VJ606 VH6 family	DSP2.3, DSP2.4, DSP2.6	JH1 mouse, JH1B6 mouse, JH2 mouse		Stop codon found in the V gene!	5->3 Frame 3, xGAA*GGLVQPGGPMKLSCVASGFTFSNYWMSWVRQSPEKGLEWVAEIRLKSNNYATHYAESVKGRFTISGDDSKSSVYLQMNSLRAEDTGIYYCTRDYGYDGDWGAGTSLTVS	GFTFSNYW....	IRLKSNNYAT	TRDYGYDGD
>L3G11C-VH	CAGGTGCTGCTTGAGGAGGAGGCTTGGTGCAACCTGGAGGATCCATGAAACTCTCCTGTGTTGCCTCTGGATTCACTTTCAGTAACTACTGGATGAACTGGGTCCGCCAGTCTCCAGAGAAGGGGCTTGAGTGGGTTGCTGAAATTAGATTGAAATCTAATAATTATGCAACACATTATGCGGAGTCTGTGAAAGGGAGGTTCACCATCTCAAGAGATGATTCCAAAAGTAGTGTCTACCTGCAAATGAACAACTTAAGACATGTGGGGCCCAGGAACCTCTGTCACTGTCTCCTCA	V segment of the Igh-VJ606 VH6 family	The D segment was not found	JH4, JH2, JH1		The second cystein is not in the right position!	5->3 Frame 3, GGGLVQPGGSMKLSCVASGFTFSNYWMNWVRQSPEKGLEWVAEIRLKSNNYATHYAESVKGRFTISRDDSKSSVYLQMNNLRHVGPRNL	GFTFSNYW....	IRLKSNNYAT
(B) Ig VLK sequence of Lib03 anti-phOx clones
Name	nt seq (5'->3')	V-seg Alignment	D-seg Alignment	J-seg Alignment	P&N Junction Analysis	CDR Analysis	Ig Gene ORF	CDR1	CDR2	CDR3
>L3H11A-VL	GATGTCGTGCTCACACAGACTACAGCAATCATGTCTGCATCTCTAGGGGAACGGGTCACCATGACCTGCACTGCCAGCTCAAGTGtaagttccagttacttgcactggtaccagcagaagccaggatcctcccccaaactctggatttatagcacatccaacctggcttctggagtcccagctcgcttcagtggcagtgggtctgggacctcttactctttcacaatcagcagcatggaggctgaagatgctgccacttattactgccaccagtatcatcgttctcctcgcaacattcggcgcaggcaccagactggaaata	V segment of the IGKV4/5 subgroup		jk3, jk1, jk2	No end of CDR3 found!	No end of CDR3 found!	5->3 Frame 1, DVVLTQTTAIMSASLGERVTMTCTASSSVSSSYLHWYQQKPGSSPKLWIYSTSNLASGVPARFSGSGSGTSYSFTISSMEAEDAATYYCHQYHRSPRNIRRRHQTGN	SSVSSSY.....	STS.......	HQYHRSPRNIRRRHQTGN
>L3A8B-VL	GACGTCGTTCTGACACAGACTACAGCAATCATGTCTGCATCTCTAGGGGAACGGGTCACCATGACCTGCACTGCCAGCTCTAGTGTAAGTTCCAGTTACTTGCACTGGTACCAGCAGAAGCCAggatcctcccccaaactctggatttatagcacatccaacctggcttctggagtcccagctcgcttcagtggcagtgggtctgggacctcttactctctcacaatcagcagcatggaggctgaagacgctgccgcttattactgccagcagtatcatagttacccccccgatacgttcggcgggggcaccaaactggagatc	V segment of the IGKV4/5 subgroup		jk1, jk2, jk5			5->3 Frame 1, DVVLTQTTAIMSASLGERVTMTCTASSSVSSSYLHWYQQKPGSSPKLWIYSTSNLASGVPARFSGSGSGTSYSLTISSMEAEDAAAYYCQQYHSYPPDTFGGGTKLEI	SSVSSSY.....	STS.......	QQYHSYPPDT
>L3B10B-VL	GAGTTGTGATGACCCAGTCTCCAGCAATCATGTCTGCATCTCTAGGGGAACGGGTCACCATGACCTGCACTGCCAGCTCAAGTGTAAGTTCCAGTTACTTGCACTGGTACCAGCAGAAGCCAGGATCCTCCCCCAAACTCTGGATTTATAGCACATCCAACCTGGCTTCTGGAGTCCCAGCTCGCTTCAGTGGCAGTGGGTCTGGGACCTCTTACTCTCTCACAATCAGCAGCATGGAGGCTGAAGATGCTGCCACTTATTACTGCCACCAGTATCATCGTTCCCTTGGCACGTTCGGCGCAGGCACCAAACTGGAAATA	V segment of the IGKV4/5 subgroup.		jk1, jk2, jk4			5->3 Frame 3, xVVMTQSPAIMSASLGERVTMTCTASSSVSSSYLHWYQQKPGSSPKLWIYSTSNLASGVPARFSGSGSGTSYSLTISSMEAEDAATYYCHQYHRSLGTFGAGTKLEI	SSVSSSY.....	STS.......	HQYHRSLGT
>L3A6C-VL	GAAATCGTtATGACCcaaactccagcatccctgtccatggctataggagaaaaagtcaccatcagatgcataaccagcactgatattgatgatgatatgaactggtaccagcagaagccaggggaacctcctaatctccttatttcagaagacaatactcttcgtcctggagtcccatcccgattctccagcagtggctatggtacagattttgtttttacaattgaaaacatgctctcagaagatgctgcagattactactgtttgcaaagcgataacttgcctttagacgttcggcggagggaaagctggagatc	V segment of the IGKV10 subgroup		jk1, jk2, jk4	No end of CDR3 found!	No end of CDR3 found!	5->3 Frame 1, EIVMTQTPASLSMAIGEKVTIRCITSTDIDDDMNWYQQKPGEPPNLLISEDNTLRPGVPSRFSSSGYGTDFVFTIENMLSEDAADYYCLQSDNLPLDVRRRE	TDIDDD......	EDN.......	LQSDNLPLDVRRRE
>L3A9C-VL	GATGTCGTtCTGACACAAACTCCACTCACTTTGTCGGTTACCATTGGACaaccagcctccatctcttgcaagtcaagtcagagcctcttagatagtgatggaaagacatatttgaattggttgttacagaggccaggccagtctccaaagcgcctaatctatcaggtgtctaaactggactctggagtccctgacaggttcactggcagtggatcagggacagatttcacactgaaaatcagcagagtggaggctgaggatttgggagtttattattgctggcaaggtacataactacgttcggtggtggcacaaaattggagata	V segment of the IGKV2 subgroup		jk1, jk4, jk3	No end of CDR3 found!	Stop codon found in the CDR3 region! No end of CDR3 found!	5->3 Frame 1, DVVLTQTPLTLSVTIGQPASISCKSSQSLLDSDGKTYLNWLLQRPGQSPKRLIYQVSKLDSGVPDRFTGSGSGTDFTLKISRVEAEDLGVYYCWQGT*LRSVVAQNWR	QSLLDSDGKTY.	QVS.......	WQGT*LRSVVAQNWR
>L3B5C-VL	GATGTCGTTCTGACACAAACTCCAGCTTCTTTGGCTGTGTCTCTAGGGCAAAGGGCCACCATCTCCTGCAGAGCCAGCGAAAGTGTTGATAATTATGGCATTAGTTTTatgaactggttccaacagaaaccaggacagccacccaaactcctcatctatgctgcatccaaccaaggatccggggtccctgccaggtttagtggcagtgggtctgggacagacttcagcctcaacatccatcctatggagaaggatgatactgcaatgtatttctgtcagcaagtaaggaggttccctgacacgttcggcgctgggaccaggttggagatc	V segment of the IGKV21 subgroup		jk5, jk4, jk2			5->3 Frame 1, DVVLTQTPASLAVSLGQRATISCRASESVDNYGISFMNWFQQKPGQPPKLLIYAASNQGSGVPARFSGSGSGTDFSLNIHPMEKDDTAMYFCQQVRRFPDTFGAGTRLE	ESVDNYGISF..	AAS.......	QQVRRFPDT
>L3C4C-VL	GATATTGTGATGACCCAAACTCCAGCAATCATGTCTGCATCTCTAGGGGAACGGGTCACCATGACCTGCACtGCCAGCTCAAGTGTAAGTTCCAGTTACTTGCACTGGTACCAgCAgAaGCCAGGATCCTCCCCCaAACTCTGGATTTATAGCACATCCAACCTGGCTTCTGGAGTCCCAGCTCGCTTCAgtggcaggtgggtctgggacctcttactctctcacaatcagcagctatggaggctgaagatgctgccacttattactgccaccagtatcatcgttccccccagacattcggtgatgggaccaggtggagatc	V segment of the IGKV4/5 subgroup		jk3, jk5, jk1		The second cystein is not in the right position! The used V gene is a pseudogene!	5->3 Frame 1, IVMTQTPAIMSASLGERVTMTCTASSSVSSSYLHWYQQKPGSSPKLWIYSTSNLASGVPARFSG	SSVSSSY.....	STS.......
>L3C6C-VL	GACGTCGTGATCACCCAAACTACAGCTTCTTTGGCTGTGTCTCTAGGGCAGAGGGCCACCATCTCCTGCAGAGCCAGCGAAAGTGTTGATAATTATGGCATTAGTtTTATGAACTGGTtCCCAACAGAAACCAggaCagCcaCCCAAACTCCTCATCTATGCTGCCTCCaaCCaagGATCCGGGGTCcCTGCCACGtttagTGgCAgTGgGTCTGGGACAGACTcagcctcaacatccatcctatggaggaggatgatactgcaatgtatttctgtcagcaaagtaaggaggttccggtcaacattcggcggaggcacaaagctggagatc	V segment of the IGKV21 subgroup		jk1, jk2, jk4	No end of CDR3 found!	Stop codon found in the V gene! No end of CDR3 found!	5->3 Frame 1, DVVITQTTASLAVSLGQRATISCRASESVDNYGISFMNWFPTETRTATQTPHLCCLQPRIRGPCHV*WQWVWDRLSLNIHPMEEDDTAMYFCQQSKEVPVNIRRRHKAGD	ESVDNYGISF..	CCL.......	QQSKEVPVNIRRRHKAGD
>L3D5C-VL	GAAGTTGTGATCACCCAGACTCCAGCAATCATGTCTGCATCTCTAGGGGAACGGGTCACCATGACCTGCACTGCCAGCTCAAGTGTAAGTTCCAGTTACTTGCACTGGTACCAGCAGAAGCCAGGATCCTCCCCCAAACTCTGGATTTATAGCACATCCAACCTGGCTTCTGGAGTCCCAGCTCGCTTCAGTGGCAGTGGGTCTGGGACCTCTTACTCTCTCACAATCAGCAGCATGGAGGCTGAAGATGCTGCCACTTATTACTGCCACCAGTATCATCGTTCCACGCACGTTCGGTGGGGGCACAAAGCTGGAGATC	V segment of the IGKV4/5 subgroup		jk1, jk5, jk2	No end of CDR3 found!	No end of CDR3 found!	5->3 Frame 1, EVVITQTPAIMSASLGERVTMTCTASSSVSSSYLHWYQQKPGSSPKLWIYSTSNLASGVPARFSGSGSGTSYSLTISSMEAEDAATYYCHQYHRSTHVRWGHKAGD	SSVSSSY.....	STS.......	HQYHRSTHVRWGHKAGD
>L3D11C-VL	GAATCGTTCTGACACAGACTACAGCAATCATGTCTGCATCTCTAGGGGAACGGGTCACCATGACCTGCACTGCCAGCTCAAGTGTAAGTtCCAGTTACTTGCACTGGTACCAGCAGAAGCCAGGATCCTCCCCCAAACTCTGGATTTATAGCACATCCAACCTGGCTTCTGGAGtcccagctcgcttcagtggcagtgggtctgggacctcttactctctcacaatcagcagcatggaggctgaagatgctgccacttactactgccaccagtatcatcgttccccggggcacgttcggcgaagggacaaaactggaaata	V segment of the IGKV4/5 subgroup		jk2, jk3, jk4	No end of CDR3 found!	No end of CDR3 found!	5->3 Frame 3, xIVLTQTTAIMSASLGERVTMTCTASSSVSSSYLHWYQQKPGSSPKLWIYSTSNLASGVPARFSGSGSGTSYSLTISSMEAEDAATYYCHQYHRSPGHVRRRDKTGN	SSVSSSY.....	STS.......	HQYHRSPGHVRRRDKTGN
>L3E2C-VL	GATGTCGTGATGACCCAAACTACAGCAATCATGTCTGCATCTCTAGGGGAACGGGTCACCATGACCTGCACTGCCAGCTCAAGTGTAAGTTCCAGTTACTTGCATTGGTACCAGCAGAAGCcAggaTCCTCCCCCAAACTCTGGATTTATAGCAcatccaacctggcttctggagtcccagctcgcttcagtggcagtgggtctgggacctcttactctctcacaatcagcagcatggaggctgaagatgctgccacttattactgccaccagtatcatcgttccccgcctgacattcggaggaggcacaaaactggaaatc	V segment of the IGKV4/5 subgroup		jk1, jk2, jk3	No end of CDR3 found!	No end of CDR3 found!	5->3 Frame 1, DVVMTQTTAIMSASLGERVTMTCTASSSVSSSYLHWYQQKPGSSPKLWIYSTSNLASGVPARFSGSGSGTSYSLTISSMEAEDAATYYCHQYHRSPPDIRRRHKTGN	SSVSSSY.....	STS.......	HQYHRSPPDIRRRHKTGN
>L3E4C-VL	GAAATTGTGATCACACAGTCTCCAGCTTCTTTGGCTGTGTCTCTAGGACAGAGAGCCACTATCTTCTGCAGAGCCAGCCAGAGTGTCGATTATAATGGAATTAGTTATATGCACTGGTTCCAACAGAAACCAGGACAGCCACCCAAACTCCTCATCTATGCTGCATCCAACCTAGAATCTGGGATCCCTGCCAGGTTCAGTGGCAGTGGGTCTGGGACAGACTTCACCCTCAACATCCATCCTGTGGAGGAGGAAGATGCTGCAACCTATTACTGTCAGCAAAGTATTGAGGATCCGTATACGTTCGGCGGAGGGACCAAACTGGAGATA	V segment of the IGKV21 subgroup		jk2, jk1, jk4			5->3 Frame 1, EIVITQSPASLAVSLGQRATIFCRASQSVDYNGISYMHWFQQKPGQPPKLLIYAASNLESGIPARFSGSGSGTDFTLNIHPVEEEDAATYYCQQSIEDPYTFGGGTKLEI	QSVDYNGISY..	AAS.......	QQSIEDPYT
>L3E6C-VL	GAAGTCGgTGATGACCCAGACTCCACTCACTTTGTCGGTTACCATtGGACAaCCAGCCTCCATCTCTtGCAAGTCAAGTCAGAGCCTCTTAGATAGTgatggaaagacatatttgaattggttgttacagaggccaggccagtctccaaagcgcctaatctatctggtgtctaaactggactctggagtccctgacaggttcactggcagtggatcagggacagatttcacactgaaaatcagcagagtggaggctgaggatttgggagtttattattgctggcaaggtacacattttcctgttacgttcggtgcaggcaccagattggaaata	V segment of the IGKV2 subgroup		jk1, jk4, jk5			5->3 Frame 2, KSVMTQTPLTLSVTIGQPASISCKSSQSLLDSDGKTYLNWLLQRPGQSPKRLIYLVSKLDSGVPDRFTGSGSGTDFTLKISRVEAEDLGVYYCWQGTHFPVTFGAGTRLEI	QSLLDSDGKTY.	LVS.......	WQGTHFPVT
>L3G7c-VL	GACATTGTGCTGACCCAGACTACAGCAATCATGTCTGCATCTCTAGGGGAACGGGTCACCATGACCTGCACTGCCAGCTCAAGTGTAAGttCCAGTtACTTGCACTGGTACCAGCAGAAGCCAgGATCCTCCCCCAAACTCTGGATTTATAGCACATccaacctggcttctggagtcccagctcgcttcagtggcagtgggtctgggacctcttactctctcacaatcagcagcatggaggctgaagatgctgccacttattactgccaccagtatcatcgttcccctgacacattcggcgctggcacaagattggagata	V segment of the IGKV4/5 subgroup		jk4, jk3, jk5			5->3 Frame 1, DIVLTQTTAIMSASLGERVTMTCTASSSVSSSYLHWYQQKPGSSPKLWIYSTSNLASGVPARFSGSGSGTSYSLTISSMEAEDAATYYCHQYHRSPDTFGAGTRLEI	SSVSSSY.....	STS.......	HQYHRSPDT
>L3G11C-VL	GAAATCGTTATGACCCAATCTACAGCAATCATGTCTGCATCTCTAGGGGAACGGGTCACCATGACCTGCACTGCCAGCTCAAGTGTAAGTTCCAGTTACTTGCACTGGTACCAGCAGAAGCCAGGATCCTCCCCCAAACTCTGGATTTATAGCACATACAACCTGGCTTCTGGAGTCCCAGCTCGCTTCAGTGGCAGTGGGTCTGGGACCTCTCACTCTCTCACAATCAGCAGCATGGAGGCTGAAGATGCTGCCACTtattactgccaccagtatcatcgttccccattcacgttcggtgaagggacaagattggagatc	V segment of the IGKV4/5 subgroup		jk4, jk3, jk1			5->3 Frame 1, EIVMTQSTAIMSASLGERVTMTCTASSSVSSSYLHWYQQKPGSSPKLWIYSTYNLASGVPARFSGSGSGTSHSLTISSMEAEDAATYYCHQYHRSPFTFGEGTRLE	SSVSSSY.....	STY.......	HQYHRSPFT
Vh Summary
CDR Comparison (Ordered by CDR3 and Amino Acid Identity)
----CDR1---> <--CDR2--> <---CDR3----
L3C4C-VH ● GFNIKDYY....___IDPENGDT..___NAPFYDG*PLVCWLGSRNSAHCL Stop codon found in the CDR3 region! Out of frame rearrangement!
L3C6C-VH ● LISLTTL*....___TSSTMVIL..___ARVYAMDY Stop codon found in the V gene!
L3E2C-VH ● GFNIKDYY....___IDPENGDT..___SGGAKEPLSLS No end of CDR3 found!
L3B10B-VH ● GFTFSNYW....___IRLKSNNYAT___TRNYTHCLR No end of CDR3 found!
L3B5C-VH ● GFTFSDAW....___IRSKANNHAT___TRHPGHRLR Stop codon found in the V gene! No end of CDR3 found!
L3G7c-VH ● GFTFSNYW....___IRLKSNNYAT___TRDYGYDGD Stop codon found in the V gene!
L3A6C-VH ○ GFTFSNYW....___IRLKSNNYAI___TRRNWYFGV
L3E6C-VH ● GFTFSNYW....___xRLKSNNYAT___TRRNWYFDY Stop codon found in the V gene!
L3H11A-VH ● GFNIKDTY....___IDPANGNT..___ASNRDWFAL Stop codon found in the V gene!
L3D11C-VH ○ GYSFTGYF....___INPYNGDT..___ARVGVRNYFDI
L3A9C-VH ● GFTFSNYW....___IRLKPNNYAT___TRPGYRYDRHTGAQAPRSLSPx No end of CDR3 found!
L3E4C-VH ● GFNIKDTY....___IDPANGNT..___ARTDYPFYAMVVGWRNYTHRLL Out of frame rearrangement!
L3G11C-VH ● GFTFSNYW....___IRLKSNNYAT___... Problematic chain! The second cystein is not in the right position!
Amino Acid Sequences in FASTA format
> L3H11A-VH
xGEA*GAELVKPGASVKLSCTASGFNIKDTYMHWVKQRPEQGLEWIGRIDPANGNTKYDPKFQGKATITADTSSNTAYLQLSSLTSGDTAVYYCASNRDWFALWGPGTLLTVSS
> L3B10B-VH
xGDAGGGGLVQPGGSMKLSCVASGFTFSNYWMNWVRQSPEKGLEWVAEIRLKSNNYATHYAESVKGRFTISRDDSKSSVYLQMNNLRAEDTGIYYCTRNYTHCLR
> L3A6C-VH
xGDAAAGLVQPGGSMKLSCVASGFTFSNYWMNWVRQSPEKGLEWVAEIRLKSNNYAIHYAESVKGRFTISRDDSKSSVYLQMNNLRAEDTGIYYCTRRNWYFGVWGQGTPLTVS
> L3A9C-VH
xSDAAGGGLVQPGGSMKLSCVASGFTFSNYWMNWVRQSPEKGLEWVAEIRLKPNNYATHYAESVKGRFTISRDDSKSSVYLQMNNLRAEDTGIYYCTRPGYRYDRHTGAQAPRSLSPx
> L3B5C-VH
VLLLE*SGGGLVQPGGSMKLSCAASGFTFSDAWMDWVRQSPEKGLEWVAEIRSKANNHATYYAESVKGRFTISRDDSKSSVYLQMNSLRAEDTGIYYCTRHPGHRLR
> L3C4C-VH
xGAAGAELVRSGASVKLSCTASGFNIKDYYMHWVKQRPEQGLEWIGWIDPENGDTEYAPKFQGKATMTADTSSNTAYLQLSSLTSEDTAVYYCNAPFYDG*PLVCWLGSRNSAHCL
> L3C6C-VH
LQESGPETGEDLGLQLKMS*QAFWLLISLTTL*TG*SRAMERALTGLDVSTSSTMVILLYNQKFKGKATLTVNKSSSTAHMELRSLTSEDSAVYYCARVYAMDYWGQGN
> L3D11C-VH
xVKLEQSGPELVKPGASVKISCKASGYSFTGYFMNWVMQSHGKSLEWIGRINPYNGDTFYNQKFKGKATLTVDKSSSTAHMELRSLASEDSAVYYCARVGVRNYFDIWGPGTSVTVSA
> L3E2C-VH
xGAAGPELVRSGASVKLSCTASGFNIKDYYMHWVKQRPEQGLEWIGWIDPENGDTEYAPKFQGKATMTADTSSNTAYLQLSSLTSEDTAVYYCSGGAKEPLSLS
> L3E4C-VH
xGAAAGAELVKPGASVKLSCTASGFNIKDTYMHWVKQRPEQGLEWIGRIDPANGNTKYDPKFQGKATITADTSSNTAYLQLSSLTSEDTAVYYCARTDYPFYAMVVGWRNYTHRLL
> L3E6C-VH
xGAA*GGLVQPGGSMKLSCVASGFTFSNYWMNWVRQSPEKGLEWVAExRLKSNNYATHYAESVKGRFTISRDDSKSSVYLQMNNLRAEDTGIYYCTRRNWYFDYWGEG
> L3G7c-VH
xGAA*GGLVQPGGPMKLSCVASGFTFSNYWMSWVRQSPEKGLEWVAEIRLKSNNYATHYAESVKGRFTISGDDSKSSVYLQMNSLRAEDTGIYYCTRDYGYDGDWGAGTSLTVS
> L3G11C-VH
GGGLVQPGGSMKLSCVASGFTFSNYWMNWVRQSPEKGLEWVAEIRLKSNNYATHYAESVKGRFTISRDDSKSSVYLQMNNLRHVGPRNL
Nucleotide Sequences in FASTA format
> L3H11A-VH
CAGGTGAAGCTTGAGGAGCAGAGCTTGTGAAGCCAGGGGCCTCAGTCAAGTTGTCCTGCACAGCTTCTGGCTTCAACATTAAAGACACCTATATGCACTGGGTGAAGCAGAGGCCTGAACAGGGCCTGGAGTGGATTGGAAGGATTGATCCTGCGAATGGTAATACTAAATATGACCCGAAGTTCCAGGGCAAGGCCACTATAACAGCAGACACATCCTCCAACACAGCCTACCTGCAGCTCAGCAGCCTGACATCTGGGGACACTGCCGTCTATTACTGTGCCTCTAACCGAGACTGGTTTGCGCTATGGGGCCCAGGAACTCTGCTCACAGTCTCTTCA
> L3B10B-VH
CAGGTGATGCTGGTGGAGGAGGCTTGGTGCAACCTGGAGGATCCATGAAACTCTCCTGTGTTGCCTCTGGATTCACTTTCAGTAACTACTGGATGAACTGGGTCCGCCAGTCTCCAGAGAAGGGGCTTGAGTGGGTTGCTGAAATTAGATTGAAATCTAATAATTATGCAACACATTATGCGGAGTCTGTGAAAGGGAGGTTCACCATCTCAAGAGATGATTCCAAAAGTAGTGTCTACCTGCAAATGAACAACTTAAGAGCTGAAGACACTGGCATTTATTACTGTACCAGGAACTACACTCACTGTCTCCGCA
> L3A6C-VH
CAGGTGATGCTGCTGCAGGCTTGGTGCAACCTGGAGGATCCATGAAACTCTCCTGTGTTGCCTCTGGATTCACTTTCAGTAACTACTGGATGAACTGGGTCCGCCAGTCTCCAGAGAAGGGGCTTGAGTGGGTTGCTGAAATTAGATTGAAATCTAATAATTATGCAATACATTATGCGGAGTCTGTGAAAGGGAGGTTCACCATCTCAAGAGATGATTCCAAAAGTAGTGTCTACCTGCAAATGAACAACTTAAGAGCTGAAGACACTGGCATTTATTACTGTACCAGGAGGAACTGGTACTTCGGGGTTTGGGGCCAAGGGACCCCTCTCACTGTCTC
> L3A9C-VH
GAGTGATGCTGCTGGAGGAGGCTTGGTGCAACCTGGAGGATCCATGAAACTCTCCTGTGTTGCCTCTGGATTCACTTTCAGTAACTACTGGATGAACTGGGTCCGCCAGTCTCCAGAGAAGGGGCTTGAGTGGGTTGCTGAAATTAGATTGAAACCTAATAATTATGCAACACATTATGCGGAGTCTGTGAAAGGGAGGTTCACCATCTCAAGAGATGATTCCAAAAGTAGTGTCTACCTGCAAATGAACAACTTAAGAGCTGAAGACACTGGCATTTATTACTGTACCAGGCCCGGCTATAGGTACGACCGGCATACTGGGGCCCAGGCACCTCGGTCACTGTCTCCTCA
> L3B5C-VH
GTGCTGCTGCTGGAGTAGTCTGGAGGAGGCTTGGTGCAACCTGGAGGATCCATGAAACTCTCTTGTGCTGCCTCTGGATTCACTTTTAGTGACGCCTGGATGGACTGGGTCCGCCAGTCTCCAGAGAAGGGGCTTGAGTGGGTTGCTGAAATTAGAAGCAAAGCTAATAATCACGCAACATACTATGCTGAGTCTGTAAAAGGGAGGTTCACCATCTCAAGAGATGATTCCAAAAGTAGTGTCTACCTGCAAATGAACAGCTTAAGAGCTGAAGACACTGGCATTTATTACTGTACCAGGCACCCCGGTCACCGTCTCCGCA
> L3C4C-VH
GAGGTGCTGCTGGAGCAGAGCTTGTGAGGTCAGGGGCCTCAGTCAAGTTGTCCTGCACAGCTTCTGGCTTCAACATAAAAGACTACTATATGCACTGGGTGAAGCAGAGGCCTGAACAGGGCCTGGAGTGGATTGGATGGATTGATCCTGAGAATGGTGATACTGAATATGCCCCGAAGTTCCAGGGCAAGGCCACTATGACTGCAGACACATCCTCCAACACAGCCTACCTGCAGCTCAGCAGCCTGACATCTGAGGACACTGCCGTCTATTACTGTAATGCCCCCTTTTATGATGGTTAACCCCTTGTTTGCTGGCTGGGGTCAAGGAACTCTGCTCACTGTCTC
> L3C6C-VH
CTGCAGGAGTCTGGACCTGAGACTGGTGAAGACCTGGGACTTCAGCTGAAGATGTCCTGACAAGCCTTCTGGTTACTCATTTCACTGACTACTTTATGAACTGGGTGAAGCAGAGCCATGGAAAGAGCCTTGACTGGATTGGACGTATCCACCTCCTCTACAATGGTGATACTTCTCTACAACCAGAAGTTCAAGGGCAAGGCCACATTGACTGTAAACAAATCCTCTAGCACAGCCCACATGGAGCTCCGGAGCCTGACATCTGAGGACTCTGCAGTCTATTATTGTGCAAGAGTATATGCTATGGACTACTGGGGTCAAGGGAACT
> L3D11C-VH
GAGTGAAGCTGGAGCAGTCTGGACCTGAGCTGGTGAAGCCTGGGGCTTCAGTGAAGATATCCTGCAAGGCTTCTGGTTACTCATTTACTGGCTACTTTATGAACTGGGTGATGCAGAGCCATGGAAAGAGCCTTGAGTGGATTGGACGTATTAATCCTTACAATGGTGATACTTTCTACAACCAGAAGTTCAAGGGCAAGGCCACATTGACTGTAGACAAATCCTCTAGCACAGCCCACATGGAGCTCCGGAGCCTGGCATCTGAGGACTCTGCAGTCTATTATTGTGCAAGAGTGGGGGTACGCAACTACTTTGACATCTGGGGTCCAGGCACCTCAGTCACTGTCTCCGCA
> L3E2C-VH
CAGGTGCAGCTGGACCAGAGCTTGTGAGGTCAGGGGCCTCAGTCAAGTTGTCCTGCACAGCTTCTGGCTTCAACATTAAAGACTACTATATGCACTGGGTGAAGCAGAGGCCTGAACAGGGCCTGGAGTGGATTGGATGGATTGATCCTGAGAATGGTGATACTGAATATGCCCCGAAGTTCCAGGGCAAGGCCACTATGACTGCAGACACATCCTCCAACACAGCCTACCTGCAGCTCAGCAGCCTGACATCTGAGGACACTGCCGTCTATTACTGTAGTGGTGGGGCGAAGGAACCTCTCTCACTGTCTC
> L3E4C-VH
CAGGTGCTGCTGCAGGAGCAGAGCTTGTGAAGCCAGGGGCCTCAGTCAAGTTGTCCTGCACAGCTTCTGGCTTCAACATTAAAGACACCTATATGCATTGGGTGAAGCAGAGGCCTGAACAGGGCCTGGAGTGGATTGGAAGGATTGATCCTGCGAATGGTAATACTAAATATGACCCGAAGTTCCAGGGCAAGGCCACTATAACAGCAGACACATCCTCCAACACAGCCTACCTGCAGCTCAGCAGCCTGACATCTGAGGACACTGCCGTCTATTACTGTGCTAGAACGGATTACCCCTTCTATGCTATGGTCGTGGGGTGGAGGAACTACACTCACCGTCTCCTCA
> L3E6C-VH
GAGGTGCAGCTTAAGGAGGCTTGGTGCAACCTGGAGGATCCATGAAACTCTCCTGTGTTGCCTCTGGATTCACTTTCAGTAACTACTGGATGAACTGGGTCCGCCAGTCTCCAGAGAAGGGGCTTGAGTGGGTTGCTGAAATNAGATTGAAATCTAATAATTATGCAACACATTATGCGGAGTCTGTGAAAGGGAGGTTCACCATCTCAAGAGATGATTCCAAAAGTAGTGTCTACCTGCAAATGAACAACTTAAGAGCTGAAGACACTGGCATTTATTACTGTACCAGGAGGAACTGGTACTTCGATTACTGGGGCGAAGGG
> L3G7c-VH
GAGGTGCTGCTTAAGGAGGCTTGGTGCAACCAGGAGGACCCATGAAACTCTCCTGTGTTGCCTCTGGATTCACTTTCAGTAACTACTGGATGAGCTGGGTCCGCCAGTCTCCAGAGAAGGGGCTTGAGTGGGTTGCTGAAATTAGATTGAAATCTAATAATTATGCAACACATTATGCGGAGTCTGTGAAAGGGAGGTTCACCATCTCAGGAGATGATTCCAAAAGTAGTGTCTACCTGCAAATGAACAGCTTAAGAGCTGAAGACACTGGCATTTATTACTGTACCAGGGACTATGGTTACGACGGCGACTGGGGCGCAGGGACCTCGCTCACAGTCTC
> L3G11C-VH
GGAGGAGGCTTGGTGCAACCTGGAGGATCCATGAAACTCTCCTGTGTTGCCTCTGGATTCACTTTCAGTAACTACTGGATGAACTGGGTCCGCCAGTCTCCAGAGAAGGGGCTTGAGTGGGTTGCTGAAATTAGATTGAAATCTAATAATTATGCAACACATTATGCGGAGTCTGTGAAAGGGAGGTTCACCATCTCAAGAGATGATTCCAAAAGTAGTGTCTACCTGCAAATGAACAACTTAAGACATGTGGGGCCCAGGAACCTCT
Amino Acid Table in comma-separated values file format (file extension: .csv)
Name:,Notes / Problems:,V-Gene (VBASE2):,V-Gene (IMGT):,D-Gene (VBASE2):,D-Gene (IMGT):,J-Gene (VBASE2):,J-Gene (IMGT):,FR1:,CDR1:,FR2:,CDR2:,FR3:,CDR3:,FR4:,Amino acid sequence:
L3H11A-VH,Stop codon found in the V gene! ,musIGHV125,IGHV14S1*01,DQ52a.1,IGHD4-1*01,JH3 mouse,IGHJ3*01,xGEA*GAELVKPGASVKLSCTAS,GFNIKDTY,MHWVKQRPEQGLEWIGR,IDPANGNT,KYDPKFQGKATITADTSSNTAYLQLSSLTSGDTAVYYC,ASNRDWFAL,WGPGTLLTVSS,xGEA*GAELVKPGASVKLSCTASGFNIKDTYMHWVKQRPEQGLEWIGRIDPANGNTKYDPKFQGKATITADTSSNTAYLQLSSLTSGDTAVYYCASNRDWFALWGPGTLLTVSS
L3A8B-VH,No match found!
L3B10B-VH,No end of CDR3 found!,musIGHV114,-,not found,,JH4 mouse (same score: JH2 mouse),IGHJ4*01 (same score: IGHJ2*01),xGDAGGGGLVQPGGSMKLSCVAS,GFTFSNYW,MNWVRQSPEKGLEWVAE,IRLKSNNYAT,HYAESVKGRFTISRDDSKSSVYLQMNNLRAEDTGIYYC,TRNYTHCLR,---,xGDAGGGGLVQPGGSMKLSCVASGFTFSNYWMNWVRQSPEKGLEWVAEIRLKSNNYATHYAESVKGRFTISRDDSKSSVYLQMNNLRAEDTGIYYCTRNYTHCLR
L3A6C-VH,,musIGHV114,-,not found,,JH1 mouse,IGHJ1*01,xGDAAAGLVQPGGSMKLSCVAS,GFTFSNYW,MNWVRQSPEKGLEWVAE,IRLKSNNYAI,HYAESVKGRFTISRDDSKSSVYLQMNNLRAEDTGIYYC,TRRNWYFGV,WGQGTPLTVS,xGDAAAGLVQPGGSMKLSCVASGFTFSNYWMNWVRQSPEKGLEWVAEIRLKSNNYAIHYAESVKGRFTISRDDSKSSVYLQMNNLRAEDTGIYYCTRRNWYFGVWGQGTPLTVS
L3A9C-VH,No end of CDR3 found!,musIGHV114,-,DSP2.11,-,JH4 mouse,IGHJ4*01,xSDAAGGGLVQPGGSMKLSCVAS,GFTFSNYW,MNWVRQSPEKGLEWVAE,IRLKPNNYAT,HYAESVKGRFTISRDDSKSSVYLQMNNLRAEDTGIYYC,TRPGYRYDRHTGAQAPRSLSPx,---,xSDAAGGGLVQPGGSMKLSCVASGFTFSNYWMNWVRQSPEKGLEWVAEIRLKPNNYATHYAESVKGRFTISRDDSKSSVYLQMNNLRAEDTGIYYCTRPGYRYDRHTGAQAPRSLSPx
L3B5C-VH,Stop codon found in the V gene! No end of CDR3 found!,musIGHV265,-,not found,,JH1 mouse,IGHJ1*01,VLLLE*SGGGLVQPGGSMKLSCAAS,GFTFSDAW,MDWVRQSPEKGLEWVAE,IRSKANNHAT,YYAESVKGRFTISRDDSKSSVYLQMNSLRAEDTGIYYC,TRHPGHRLR,---,VLLLE*SGGGLVQPGGSMKLSCAASGFTFSDAWMDWVRQSPEKGLEWVAEIRSKANNHATYYAESVKGRFTISRDDSKSSVYLQMNSLRAEDTGIYYCTRHPGHRLR
L3C4C-VH,Stop codon found in the CDR3 region! Out of frame rearrangement!,musIGHV154,IGHV14S3*01,PseudoD3 (same score: DSP2.9),IGHD6-3*01 (same score: IGHD6-3*01),JH3 mouse,IGHJ3*01,xGAAGAELVRSGASVKLSCTAS,GFNIKDYY,MHWVKQRPEQGLEWIGW,IDPENGDT,EYAPKFQGKATMTADTSSNTAYLQLSSLTSEDTAVYYC,NAPFYDG*PLVCWLGSRNSAHCL,---,xGAAGAELVRSGASVKLSCTASGFNIKDYYMHWVKQRPEQGLEWIGWIDPENGDTEYAPKFQGKATMTADTSSNTAYLQLSSLTSEDTAVY…
L3C6C-VH,Stop codon found in the V gene! ,musIGHV294,-,not found,,JH4 mouse,IGHJ4*01,LQESGPETGEDLGLQLKMS*QAFWL,LISLTTL*,TG*SRAMERALTGLDVS,TSSTMVIL,LYNQKFKGKATLTVNKSSSTAHMELRSLTSEDSAVYYC,ARVYAMDY,WGQGN,LQESGPETGEDLGLQLKMS*QAFWLLISLTTL*TG*SRAMERALTGLDVSTSSTMVILLYNQKFKGKATLTVNKSSSTAHMELRSLTSEDSAVYYCARVYAMDYWGQGN
L3D5C-VH,No match found!
L3D11C-VH,,musIGHV479,,IGHD2-14*01 (same score: DSP2.10; DSP2.11),IGHD2-14*01 (same score: -; -),JH2 mouse,IGHJ2*01,xVKLEQSGPELVKPGASVKISCKAS,GYSFTGYF,MNWVMQSHGKSLEWIGR,INPYNGDT,FYNQKFKGKATLTVDKSSSTAHMELRSLASEDSAVYYC,ARVGVRNYFDI,WGPGTSVTVSA,xVKLEQSGPELVKPGASVKISCKASGYSFTGYFMNWVMQSHGKSLEWIGRINPYNGDTFYNQKFKGKATLTVDKSSSTAHMELRSLASEDSAVYYCARVGVRNYFDIWGPGTSVTVSA
L3E2C-VH,No end of CDR3 found!,musIGHV154,IGHV14S3*01,not found,,JH4 mouse (same score: JH2 mouse),IGHJ4*01 (same score: IGHJ2*01),xGAAGPELVRSGASVKLSCTAS,GFNIKDYY,MHWVKQRPEQGLEWIGW,IDPENGDT,EYAPKFQGKATMTADTSSNTAYLQLSSLTSEDTAVYYC,SGGAKEPLSLS,---,xGAAGPELVRSGASVKLSCTASGFNIKDYYMHWVKQRPEQGLEWIGWIDPENGDTEYAPKFQGKATMTADTSSNTAYLQLSSLTSEDTAVYYCSGGAKEPLSLS
L3E4C-VH,Out of frame rearrangement!,musIGHV125,IGHV14S1*01,DSP2.7,IGHD2-10*01,JH4 mouse,IGHJ4*01,xGAAAGAELVKPGASVKLSCTAS,GFNIKDTY,MHWVKQRPEQGLEWIGR,IDPANGNT,KYDPKFQGKATITADTSSNTAYLQLSSLTSEDTAVYYC,ARTDYPFYAMVVGWRNYTHRLL,---,xGAAAGAELVKPGASVKLSCTASGFNIKDTYMHWVKQRPEQGLEWIGRIDPANGNTKYDPKFQGKATITADTSSNTAYLQLSSLTSEDTAVYYCARTDYPFYAMVVGWRNYTHRLL
L3E6C-VH,Stop codon found in the V gene! ,musIGHV114,-,not found,,JH1 mouse,IGHJ1*01,xGAA*GGLVQPGGSMKLSCVAS,GFTFSNYW,MNWVRQSPEKGLEWVAE,xRLKSNNYAT,HYAESVKGRFTISRDDSKSSVYLQMNNLRAEDTGIYYC,TRRNWYFDY,WGEG,xGAA*GGLVQPGGSMKLSCVASGFTFSNYWMNWVRQSPEKGLEWVAExRLKSNNYATHYAESVKGRFTISRDDSKSSVYLQMNNLRAEDTGIYYCTRRNWYFDYWGEG
L3G7c-VH,Stop codon found in the V gene! ,musIGHV114,-,DSP2.3 (same score: DSP2.4; DSP2.6),IGHD2-7*01 (same score: IGHD2-2*01; IGHD2-9*01),JH1 mouse,IGHJ1*01,xGAA*GGLVQPGGPMKLSCVAS,GFTFSNYW,MSWVRQSPEKGLEWVAE,IRLKSNNYAT,HYAESVKGRFTISGDDSKSSVYLQMNSLRAEDTGIYYC,TRDYGYDGD,WGAGTSLTVS,xGAA*GGLVQPGGPMKLSCVASGFTFSNYWMSWVRQSPEKGLEWVAEIRLKSNNYATHYAESVKGRFTISGDDSKSSVYLQMNSLRAEDTGIYYCTRDYGYDGDWGAGTSLTVS
L3G11C-VH,The second cystein is not in the right position! ,musIGHV114,-,not found,,JH4 mouse (same score: JH2 mouse; JH1 mouse),IGHJ4*01 (same score: IGHJ2*01; IGHJ1*01),GGGLVQPGGSMKLSCVAS,GFTFSNYW,MNWVRQSPEKGLEWVAE,IRLKSNNYAT,HYAESVKGRFTISRDDSKSSVYLQMNNLRHVGPRNL,---,---,GGGLVQPGGSMKLSCVASGFTFSNYWMNWVRQSPEKGLEWVAEIRLKSNNYATHYAESVKGRFTISRDDSKSSVYLQMNNLRHVGPRNL
Nucleotide Table in comma-separated values file format (file extension: .csv)
Name:,Notes / Problems:,V-Gene (VBASE2):,V-Gene (IMGT):,D-Gene (VBASE2):,D-Gene (IMGT):,J-Gene (VBASE2):,J-Gene (IMGT):,V-FR1:,V-CDR1:,V-FR2:,V-CDR2:,V-FR3:,V-CDR3:,P1-CDR3:,N1-CDR3:,P2-CDR3:,D-CDR3:,P3-CDR3:,N2-CDR3:,P4-CDR3:,J-CDR3:,J-FR4:
L3H11A-VH,Stop codon found in the V gene! ,musIGHV125,IGHV14S1*01,DQ52a.1,IGHD4-1*01,JH3 mouse,IGHJ3*01,CAGGTGAAGCTTGAGGAGCAGAGCTTGTGAAGCCAGGGGCCTCAGTCAAGTTGTCCTGCACAGCTTCT,GGCTTCAACATTAAAGACACCTAT,ATGCACTGGGTGAAGCAGAGGCCTGAACAGGGCCTGGAGTGGATTGGAAGG,ATTGATCCTGCGAATGGTAATACT,AAATATGACCCGAAGTTCCAGGGCAAGGCCACTATAACAGCAGACACATCCTCCAACACAGCCTACCTGCAGCTCAGCAGCCTGACATCTGGGGACACTGCCGTCTATTACTGT,GC,---,CT…
L3A8B-VH,No match found!
L3B10B-VH,No end of CDR3 found!,musIGHV114,-,not found,,JH4 mouse (same score: JH2 mouse),IGHJ4*01 (same score: IGHJ2*01),CAGGTGATGCTGGTGGAGGAGGCTTGGTGCAACCTGGAGGATCCATGAAACTCTCCTGTGTTGCCTCT,GGATTCACTTTCAGTAACTACTGG,ATGAACTGGGTCCGCCAGTCTCCAGAGAAGGGGCTTGAGTGGGTTGCTGAA,ATTAGATTGAAATCTAATAATTATGCAACA,CATTATGCGGAGTCTGTGAAAGGGAGGTTCACCATCTCAAGAGATGATTCCAAAAGTAGTGTCTACCTGCAAATGAACAACTTAAGAGCTGAAGACACTG…
L3A6C-VH,,musIGHV114,-,not found,,JH1 mouse,IGHJ1*01,CAGGTGATGCTGCTGCAGGCTTGGTGCAACCTGGAGGATCCATGAAACTCTCCTGTGTTGCCTCT,GGATTCACTTTCAGTAACTACTGG,ATGAACTGGGTCCGCCAGTCTCCAGAGAAGGGGCTTGAGTGGGTTGCTGAA,ATTAGATTGAAATCTAATAATTATGCAATA,CATTATGCGGAGTCTGTGAAAGGGAGGTTCACCATCTCAAGAGATGATTCCAAAAGTAGTGTCTACCTGCAAATGAACAACTTAAGAGCTGAAGACACTGGCATTTATTACTGT,ACCAGG,---,AGGA,---,---,---,---,---,ACTGGTACTTCGGGGTT,TGG…
L3A9C-VH,No end of CDR3 found!,musIGHV114,-,DSP2.11,-,JH4 mouse,IGHJ4*01,GAGTGATGCTGCTGGAGGAGGCTTGGTGCAACCTGGAGGATCCATGAAACTCTCCTGTGTTGCCTCT,GGATTCACTTTCAGTAACTACTGG,ATGAACTGGGTCCGCCAGTCTCCAGAGAAGGGGCTTGAGTGGGTTGCTGAA,ATTAGATTGAAACCTAATAATTATGCAACA,CATTATGCGGAGTCTGTGAAAGGGAGGTTCACCATCTCAAGAGATGATTCCAAAAGTAGTGTCTACCTGCAAATGAACAACTTAAGAGCTGAAGACACTGGCATTTATTACTGT,TGTACCAGG,C,---,---,CCGGCTATAGGTACG…
L3B5C-VH,Stop codon found in the V gene! No end of CDR3 found!,musIGHV265,-,not found,,JH1 mouse,IGHJ1*01,GTGCTGCTGCTGGAGTAGTCTGGAGGAGGCTTGGTGCAACCTGGAGGATCCATGAAACTCTCTTGTGCTGCCTCT,GGATTCACTTTTAGTGACGCCTGG,ATGGACTGGGTCCGCCAGTCTCCAGAGAAGGGGCTTGAGTGGGTTGCTGAA,ATTAGAAGCAAAGCTAATAATCACGCAACA,TACTATGCTGAGTCTGTAAAAGGGAGGTTCACCATCTCAAGAGATGATTCCAAAAGTAGTGTCTACCTGCAAATGAACAGCTTAAGAGCTGAAGACACTGGCATTTATT…
L3C4C-VH,Stop codon found in the CDR3 region! Out of frame rearrangement!,musIGHV154,IGHV14S3*01,PseudoD3 (same score: DSP2.9),IGHD6-3*01 (same score: IGHD6-3*01),JH3 mouse,IGHJ3*01,GAGGTGCTGCTGGAGCAGAGCTTGTGAGGTCAGGGGCCTCAGTCAAGTTGTCCTGCACAGCTTCT,GGCTTCAACATAAAAGACTACTAT,ATGCACTGGGTGAAGCAGAGGCCTGAACAGGGCCTGGAGTGGATTGGATGG,ATTGATCCTGAGAATGGTGATACT,GAATATGCCCCGAAGTTCCAGGGCAAGGCCACTATGACTGCAGACACAT…
L3C6C-VH,Stop codon found in the V gene! ,musIGHV294,-,not found,,JH4 mouse,IGHJ4*01,CTGCAGGAGTCTGGACCTGAGACTGGTGAAGACCTGGGACTTCAGCTGAAGATGTCCTGACAAGCCTTCTGGTTA,CTCATTTCACTGACTACTTTATGA,ACTGGGTGAAGCAGAGCCATGGAAAGAGCCTTGACTGGATTGGACGTATCC,ACCTCCTCTACAATGGTGATACTT,CTCTACAACCAGAAGTTCAAGGGCAAGGCCACATTGACTGTAAACAAATCCTCTAGCACAGCCCACATGGAGCTCCGGAGCCTGACATCTGAGGACTCTGCAGTCTATTATTGT,GCAAGA,---,G,---,---,…
L3D5C-VH,No match found!
L3D11C-VH,,musIGHV479,,IGHD2-14*01 (same score: DSP2.10; DSP2.11),IGHD2-14*01 (same score: -; -),JH2 mouse,IGHJ2*01,GAGTGAAGCTGGAGCAGTCTGGACCTGAGCTGGTGAAGCCTGGGGCTTCAGTGAAGATATCCTGCAAGGCTTCT,GGTTACTCATTTACTGGCTACTTT,ATGAACTGGGTGATGCAGAGCCATGGAAAGAGCCTTGAGTGGATTGGACGT,ATTAATCCTTACAATGGTGATACT,TTCTACAACCAGAAGTTCAAGGGCAAGGCCACATTGACTGTAGACAAATCCTCTAGCACAGCCCACATGGAGCTCCGGAGCCTGGCATCTGAGGACTCTGCAGTCT…
L3E2C-VH,No end of CDR3 found!,musIGHV154,IGHV14S3*01,not found,,JH4 mouse (same score: JH2 mouse),IGHJ4*01 (same score: IGHJ2*01),CAGGTGCAGCTGGACCAGAGCTTGTGAGGTCAGGGGCCTCAGTCAAGTTGTCCTGCACAGCTTCT,GGCTTCAACATTAAAGACTACTAT,ATGCACTGGGTGAAGCAGAGGCCTGAACAGGGCCTGGAGTGGATTGGATGG,ATTGATCCTGAGAATGGTGATACT,GAATATGCCCCGAAGTTCCAGGGCAAGGCCACTATGACTGCAGACACATCCTCCAACACAGCCTACCTGCAGCTCAGCAGCCTGACATCTGAGGACACTG…
L3E4C-VH,Out of frame rearrangement!,musIGHV125,IGHV14S1*01,DSP2.7,IGHD2-10*01,JH4 mouse,IGHJ4*01,CAGGTGCTGCTGCAGGAGCAGAGCTTGTGAAGCCAGGGGCCTCAGTCAAGTTGTCCTGCACAGCTTCT,GGCTTCAACATTAAAGACACCTAT,ATGCATTGGGTGAAGCAGAGGCCTGAACAGGGCCTGGAGTGGATTGGAAGG,ATTGATCCTGCGAATGGTAATACT,AAATATGACCCGAAGTTCCAGGGCAAGGCCACTATAACAGCAGACACATCCTCCAACACAGCCTACCTGCAGCTCAGCAGCCTGACATCTGAGGACACTGCCGTCTATTACTGT,TGTGCTAGA,---,A…
L3E6C-VH,Stop codon found in the V gene! ,musIGHV114,-,not found,,JH1 mouse,IGHJ1*01,GAGGTGCAGCTTAAGGAGGCTTGGTGCAACCTGGAGGATCCATGAAACTCTCCTGTGTTGCCTCT,GGATTCACTTTCAGTAACTACTGG,ATGAACTGGGTCCGCCAGTCTCCAGAGAAGGGGCTTGAGTGGGTTGCTGAA,ATNAGATTGAAATCTAATAATTATGCAACA,CATTATGCGGAGTCTGTGAAAGGGAGGTTCACCATCTCAAGAGATGATTCCAAAAGTAGTGTCTACCTGCAAATGAACAACTTAAGAGCTGAAGACACTGGCATTTATTACTGT,ACCAGG,---,AGGA,---,---,-…
L3G7c-VH,Stop codon found in the V gene! ,musIGHV114,-,DSP2.3 (same score: DSP2.4; DSP2.6),IGHD2-7*01 (same score: IGHD2-2*01; IGHD2-9*01),JH1 mouse,IGHJ1*01,GAGGTGCTGCTTAAGGAGGCTTGGTGCAACCAGGAGGACCCATGAAACTCTCCTGTGTTGCCTCT,GGATTCACTTTCAGTAACTACTGG,ATGAGCTGGGTCCGCCAGTCTCCAGAGAAGGGGCTTGAGTGGGTTGCTGAA,ATTAGATTGAAATCTAATAATTATGCAACA,CATTATGCGGAGTCTGTGAAAGGGAGGTTCACCATCTCAGGAGATGATTCCAAAAGTAGTGTCTACC…
L3G11C-VH,The second cystein is not in the right position! ,musIGHV114,-,not found,,JH4 mouse (same score: JH2 mouse; JH1 mouse),IGHJ4*01 (same score: IGHJ2*01; IGHJ1*01),GGAGGAGGCTTGGTGCAACCTGGAGGATCCATGAAACTCTCCTGTGTTGCCTCT,GGATTCACTTTCAGTAACTACTGG,ATGAACTGGGTCCGCCAGTCTCCAGAGAAGGGGCTTGAGTGGGTTGCTGAA,ATTAGATTGAAATCTAATAATTATGCAACA,CATTATGCGGAGTCTGTGAAAGGGAGGTTCACCATCTCAAGAGATGATTCCAAAAGTAGTGTCTA…
CDR Comparison (Ordered by CDR3 and Amino Acid Identity)
----CDR1---> <--CDR2--> <---CDR3----
L3H11A-VL ● SSVSSSY.....___STS.......___HQYHRSPRNIRRRHQTGN No end of CDR3 found!
L3E2C-VL ● SSVSSSY.....___STS.......___HQYHRSPPDIRRRHKTGN No end of CDR3 found!
L3D11C-VL ● SSVSSSY.....___STS.......___HQYHRSPGHVRRRDKTGN No end of CDR3 found!
L3G11C-VL ○ SSVSSSY.....___STY.......___HQYHRSPFT
L3G7c-VL ○ SSVSSSY.....___STS.......___HQYHRSPDT
L3B10B-VL ○ SSVSSSY.....___STS.......___HQYHRSLGT
L3C6C-VL ● ESVDNYGISF..___CCL.......___QQSKEVPVNIRRRHKAGD Stop codon found in the V gene! No end of CDR3 found!
L3A8B-VL ○ SSVSSSY.....___STS.......___QQYHSYPPDT
L3B5C-VL ○ ESVDNYGISF..___AAS.......___QQVRRFPDT
L3A6C-VL ● TDIDDD......___EDN.......___LQSDNLPLDVRRRE No end of CDR3 found!
L3D5C-VL ● SSVSSSY.....___STS.......___HQYHRSTHVRWGHKAGD No end of CDR3 found!
L3E4C-VL ○ QSVDYNGISY..___AAS.......___QQSIEDPYT
L3E6C-VL ○ QSLLDSDGKTY.___LVS.......___WQGTHFPVT
L3A9C-VL ● QSLLDSDGKTY.___QVS.......___WQGT*LRSVVAQNWR Stop codon found in the CDR3 region! No end of CDR3 found!
L3C4C-VL ● SSVSSSY.....___STS.......___... Problematic chain! The second cystein is not in the right position! The used V gene is a pseudogene!
Amino Acid Sequences in FASTA format
> L3H11A-VL
DVVLTQTTAIMSASLGERVTMTCTASSSVSSSYLHWYQQKPGSSPKLWIYSTSNLASGVPARFSGSGSGTSYSFTISSMEAEDAATYYCHQYHRSPRNIRRRHQTGN
> L3A8B-VL
DVVLTQTTAIMSASLGERVTMTCTASSSVSSSYLHWYQQKPGSSPKLWIYSTSNLASGVPARFSGSGSGTSYSLTISSMEAEDAAAYYCQQYHSYPPDTFGGGTKLEI
> L3B10B-VL
xVVMTQSPAIMSASLGERVTMTCTASSSVSSSYLHWYQQKPGSSPKLWIYSTSNLASGVPARFSGSGSGTSYSLTISSMEAEDAATYYCHQYHRSLGTFGAGTKLEI
> L3A6C-VL
EIVMTQTPASLSMAIGEKVTIRCITSTDIDDDMNWYQQKPGEPPNLLISEDNTLRPGVPSRFSSSGYGTDFVFTIENMLSEDAADYYCLQSDNLPLDVRRRE
> L3A9C-VL
DVVLTQTPLTLSVTIGQPASISCKSSQSLLDSDGKTYLNWLLQRPGQSPKRLIYQVSKLDSGVPDRFTGSGSGTDFTLKISRVEAEDLGVYYCWQGT*LRSVVAQNWR
> L3B5C-VL
DVVLTQTPASLAVSLGQRATISCRASESVDNYGISFMNWFQQKPGQPPKLLIYAASNQGSGVPARFSGSGSGTDFSLNIHPMEKDDTAMYFCQQVRRFPDTFGAGTRLE
> L3C4C-VL
IVMTQTPAIMSASLGERVTMTCTASSSVSSSYLHWYQQKPGSSPKLWIYSTSNLASGVPARFSG
> L3C6C-VL
DVVITQTTASLAVSLGQRATISCRASESVDNYGISFMNWFPTETRTATQTPHLCCLQPRIRGPCHV*WQWVWDRLSLNIHPMEEDDTAMYFCQQSKEVPVNIRRRHKAGD
> L3D5C-VL
EVVITQTPAIMSASLGERVTMTCTASSSVSSSYLHWYQQKPGSSPKLWIYSTSNLASGVPARFSGSGSGTSYSLTISSMEAEDAATYYCHQYHRSTHVRWGHKAGD
> L3D11C-VL
xIVLTQTTAIMSASLGERVTMTCTASSSVSSSYLHWYQQKPGSSPKLWIYSTSNLASGVPARFSGSGSGTSYSLTISSMEAEDAATYYCHQYHRSPGHVRRRDKTGN
> L3E2C-VL
DVVMTQTTAIMSASLGERVTMTCTASSSVSSSYLHWYQQKPGSSPKLWIYSTSNLASGVPARFSGSGSGTSYSLTISSMEAEDAATYYCHQYHRSPPDIRRRHKTGN
> L3E4C-VL
EIVITQSPASLAVSLGQRATIFCRASQSVDYNGISYMHWFQQKPGQPPKLLIYAASNLESGIPARFSGSGSGTDFTLNIHPVEEEDAATYYCQQSIEDPYTFGGGTKLEI
> L3E6C-VL
KSVMTQTPLTLSVTIGQPASISCKSSQSLLDSDGKTYLNWLLQRPGQSPKRLIYLVSKLDSGVPDRFTGSGSGTDFTLKISRVEAEDLGVYYCWQGTHFPVTFGAGTRLEI
> L3G7c-VL
DIVLTQTTAIMSASLGERVTMTCTASSSVSSSYLHWYQQKPGSSPKLWIYSTSNLASGVPARFSGSGSGTSYSLTISSMEAEDAATYYCHQYHRSPDTFGAGTRLEI
> L3G11C-VL
EIVMTQSTAIMSASLGERVTMTCTASSSVSSSYLHWYQQKPGSSPKLWIYSTYNLASGVPARFSGSGSGTSHSLTISSMEAEDAATYYCHQYHRSPFTFGEGTRLE
Nucleotide Sequences in FASTA format
> L3H11A-VL
GATGTCGTGCTCACACAGACTACAGCAATCATGTCTGCATCTCTAGGGGAACGGGTCACCATGACCTGCACTGCCAGCTCAAGTGTAAGTTCCAGTTACTTGCACTGGTACCAGCAGAAGCCAGGATCCTCCCCCAAACTCTGGATTTATAGCACATCCAACCTGGCTTCTGGAGTCCCAGCTCGCTTCAGTGGCAGTGGGTCTGGGACCTCTTACTCTTTCACAATCAGCAGCATGGAGGCTGAAGATGCTGCCACTTATTACTGCCACCAGTATCATCGTTCTCCTCGCAACATTCGGCGCAGGCACCAGACTGGAAATA
> L3A8B-VL
GACGTCGTTCTGACACAGACTACAGCAATCATGTCTGCATCTCTAGGGGAACGGGTCACCATGACCTGCACTGCCAGCTCTAGTGTAAGTTCCAGTTACTTGCACTGGTACCAGCAGAAGCCAGGATCCTCCCCCAAACTCTGGATTTATAGCACATCCAACCTGGCTTCTGGAGTCCCAGCTCGCTTCAGTGGCAGTGGGTCTGGGACCTCTTACTCTCTCACAATCAGCAGCATGGAGGCTGAAGACGCTGCCGCTTATTACTGCCAGCAGTATCATAGTTACCCCCCCGATACGTTCGGCGGGGGCACCAAACTGGAGATC
> L3B10B-VL
GAGTTGTGATGACCCAGTCTCCAGCAATCATGTCTGCATCTCTAGGGGAACGGGTCACCATGACCTGCACTGCCAGCTCAAGTGTAAGTTCCAGTTACTTGCACTGGTACCAGCAGAAGCCAGGATCCTCCCCCAAACTCTGGATTTATAGCACATCCAACCTGGCTTCTGGAGTCCCAGCTCGCTTCAGTGGCAGTGGGTCTGGGACCTCTTACTCTCTCACAATCAGCAGCATGGAGGCTGAAGATGCTGCCACTTATTACTGCCACCAGTATCATCGTTCCCTTGGCACGTTCGGCGCAGGCACCAAACTGGAAAT
> L3A6C-VL
GAAATCGTTATGACCCAAACTCCAGCATCCCTGTCCATGGCTATAGGAGAAAAAGTCACCATCAGATGCATAACCAGCACTGATATTGATGATGATATGAACTGGTACCAGCAGAAGCCAGGGGAACCTCCTAATCTCCTTATTTCAGAAGACAATACTCTTCGTCCTGGAGTCCCATCCCGATTCTCCAGCAGTGGCTATGGTACAGATTTTGTTTTTACAATTGAAAACATGCTCTCAGAAGATGCTGCAGATTACTACTGTTTGCAAAGCGATAACTTGCCTTTAGACGTTCGGCGGAGGGA
> L3A9C-VL
GATGTCGTTCTGACACAAACTCCACTCACTTTGTCGGTTACCATTGGACAACCAGCCTCCATCTCTTGCAAGTCAAGTCAGAGCCTCTTAGATAGTGATGGAAAGACATATTTGAATTGGTTGTTACAGAGGCCAGGCCAGTCTCCAAAGCGCCTAATCTATCAGGTGTCTAAACTGGACTCTGGAGTCCCTGACAGGTTCACTGGCAGTGGATCAGGGACAGATTTCACACTGAAAATCAGCAGAGTGGAGGCTGAGGATTTGGGAGTTTATTATTGCTGGCAAGGTACATAACTACGTTCGGTGGTGGCACAAAATTGGAGAT
> L3B5C-VL
GATGTCGTTCTGACACAAACTCCAGCTTCTTTGGCTGTGTCTCTAGGGCAAAGGGCCACCATCTCCTGCAGAGCCAGCGAAAGTGTTGATAATTATGGCATTAGTTTTATGAACTGGTTCCAACAGAAACCAGGACAGCCACCCAAACTCCTCATCTATGCTGCATCCAACCAAGGATCCGGGGTCCCTGCCAGGTTTAGTGGCAGTGGGTCTGGGACAGACTTCAGCCTCAACATCCATCCTATGGAGAAGGATGATACTGCAATGTATTTCTGTCAGCAAGTAAGGAGGTTCCCTGACACGTTCGGCGCTGGGACCAGGTTGGAG
> L3C4C-VL
ATTGTGATGACCCAAACTCCAGCAATCATGTCTGCATCTCTAGGGGAACGGGTCACCATGACCTGCACTGCCAGCTCAAGTGTAAGTTCCAGTTACTTGCACTGGTACCAGCAGAAGCCAGGATCCTCCCCCAAACTCTGGATTTATAGCACATCCAACCTGGCTTCTGGAGTCCCAGCTCGCTTCAGTGGC
> L3C6C-VL
GACGTCGTGATCACCCAAACTACAGCTTCTTTGGCTGTGTCTCTAGGGCAGAGGGCCACCATCTCCTGCAGAGCCAGCGAAAGTGTTGATAATTATGGCATTAGTTTTATGAACTGGTTCCCAACAGAAACCAGGACAGCCACCCAAACTCCTCATCTATGCTGCCTCCAACCAAGGATCCGGGGTCCCTGCCACGTTTAGTGGCAGTGGGTCTGGGACAGACTCAGCCTCAACATCCATCCTATGGAGGAGGATGATACTGCAATGTATTTCTGTCAGCAAAGTAAGGAGGTTCCGGTCAACATTCGGCGGAGGCACAAAGCTGGAGATC
> L3D5C-VL
GAAGTTGTGATCACCCAGACTCCAGCAATCATGTCTGCATCTCTAGGGGAACGGGTCACCATGACCTGCACTGCCAGCTCAAGTGTAAGTTCCAGTTACTTGCACTGGTACCAGCAGAAGCCAGGATCCTCCCCCAAACTCTGGATTTATAGCACATCCAACCTGGCTTCTGGAGTCCCAGCTCGCTTCAGTGGCAGTGGGTCTGGGACCTCTTACTCTCTCACAATCAGCAGCATGGAGGCTGAAGATGCTGCCACTTATTACTGCCACCAGTATCATCGTTCCACGCACGTTCGGTGGGGGCACAAAGCTGGAGATC
> L3D11C-VL
GAATCGTTCTGACACAGACTACAGCAATCATGTCTGCATCTCTAGGGGAACGGGTCACCATGACCTGCACTGCCAGCTCAAGTGTAAGTTCCAGTTACTTGCACTGGTACCAGCAGAAGCCAGGATCCTCCCCCAAACTCTGGATTTATAGCACATCCAACCTGGCTTCTGGAGTCCCAGCTCGCTTCAGTGGCAGTGGGTCTGGGACCTCTTACTCTCTCACAATCAGCAGCATGGAGGCTGAAGATGCTGCCACTTACTACTGCCACCAGTATCATCGTTCCCCGGGGCACGTTCGGCGAAGGGACAAAACTGGAAATA
> L3E2C-VL
GATGTCGTGATGACCCAAACTACAGCAATCATGTCTGCATCTCTAGGGGAACGGGTCACCATGACCTGCACTGCCAGCTCAAGTGTAAGTTCCAGTTACTTGCATTGGTACCAGCAGAAGCCAGGATCCTCCCCCAAACTCTGGATTTATAGCACATCCAACCTGGCTTCTGGAGTCCCAGCTCGCTTCAGTGGCAGTGGGTCTGGGACCTCTTACTCTCTCACAATCAGCAGCATGGAGGCTGAAGATGCTGCCACTTATTACTGCCACCAGTATCATCGTTCCCCGCCTGACATTCGGAGGAGGCACAAAACTGGAAATC
> L3E4C-VL
GAAATTGTGATCACACAGTCTCCAGCTTCTTTGGCTGTGTCTCTAGGACAGAGAGCCACTATCTTCTGCAGAGCCAGCCAGAGTGTCGATTATAATGGAATTAGTTATATGCACTGGTTCCAACAGAAACCAGGACAGCCACCCAAACTCCTCATCTATGCTGCATCCAACCTAGAATCTGGGATCCCTGCCAGGTTCAGTGGCAGTGGGTCTGGGACAGACTTCACCCTCAACATCCATCCTGTGGAGGAGGAAGATGCTGCAACCTATTACTGTCAGCAAAGTATTGAGGATCCGTATACGTTCGGCGGAGGGACCAAACTGGAGATA
> L3E6C-VL
AAGTCGGTGATGACCCAGACTCCACTCACTTTGTCGGTTACCATTGGACAACCAGCCTCCATCTCTTGCAAGTCAAGTCAGAGCCTCTTAGATAGTGATGGAAAGACATATTTGAATTGGTTGTTACAGAGGCCAGGCCAGTCTCCAAAGCGCCTAATCTATCTGGTGTCTAAACTGGACTCTGGAGTCCCTGACAGGTTCACTGGCAGTGGATCAGGGACAGATTTCACACTGAAAATCAGCAGAGTGGAGGCTGAGGATTTGGGAGTTTATTATTGCTGGCAAGGTACACATTTTCCTGTTACGTTCGGTGCAGGCACCAGATTGGAAAT
> L3G7c-VL
GACATTGTGCTGACCCAGACTACAGCAATCATGTCTGCATCTCTAGGGGAACGGGTCACCATGACCTGCACTGCCAGCTCAAGTGTAAGTTCCAGTTACTTGCACTGGTACCAGCAGAAGCCAGGATCCTCCCCCAAACTCTGGATTTATAGCACATCCAACCTGGCTTCTGGAGTCCCAGCTCGCTTCAGTGGCAGTGGGTCTGGGACCTCTTACTCTCTCACAATCAGCAGCATGGAGGCTGAAGATGCTGCCACTTATTACTGCCACCAGTATCATCGTTCCCCTGACACATTCGGCGCTGGCACAAGATTGGAGATA
> L3G11C-VL
GAAATCGTTATGACCCAATCTACAGCAATCATGTCTGCATCTCTAGGGGAACGGGTCACCATGACCTGCACTGCCAGCTCAAGTGTAAGTTCCAGTTACTTGCACTGGTACCAGCAGAAGCCAGGATCCTCCCCCAAACTCTGGATTTATAGCACATACAACCTGGCTTCTGGAGTCCCAGCTCGCTTCAGTGGCAGTGGGTCTGGGACCTCTCACTCTCTCACAATCAGCAGCATGGAGGCTGAAGATGCTGCCACTTATTACTGCCACCAGTATCATCGTTCCCCATTCACGTTCGGTGAAGGGACAAGATTGGA
Amino Acid Table in comma-separated values file format (file extension: .csv)
Name:,Notes / Problems:,V-Gene (VBASE2):,V-Gene (IMGT):,D-Gene (VBASE2):,D-Gene (IMGT):,J-Gene (VBASE2):,J-Gene (IMGT):,FR1:,CDR1:,FR2:,CDR2:,FR3:,CDR3:,FR4:,Amino acid sequence:
L3H11A-VL,No end of CDR3 found!,musIGKV154,IGKV4-74*01,---,---,jk3,IGKJ3*01,DVVLTQTTAIMSASLGERVTMTCTAS,SSVSSSY,LHWYQQKPGSSPKLWIY,STS,NLASGVPARFSGSGSGTSYSFTISSMEAEDAATYYC,HQYHRSPRNIRRRHQTGN,---,DVVLTQTTAIMSASLGERVTMTCTASSSVSSSYLHWYQQKPGSSPKLWIYSTSNLASGVPARFSGSGSGTSYSFTISSMEAEDAATYYCHQYHRSPRNIRRRHQTGN
L3A8B-VL,,musIGKV154,IGKV4-74*01,---,---,jk1,IGKJ1*01,DVVLTQTTAIMSASLGERVTMTCTAS,SSVSSSY,LHWYQQKPGSSPKLWIY,STS,NLASGVPARFSGSGSGTSYSLTISSMEAEDAAAYYC,QQYHSYPPDT,FGGGTKLEI,DVVLTQTTAIMSASLGERVTMTCTASSSVSSSYLHWYQQKPGSSPKLWIYSTSNLASGVPARFSGSGSGTSYSLTISSMEAEDAAAYYCQQYHSYPPDTFGGGTKLEI
L3B10B-VL,,musIGKV154,IGKV4-74*01,---,---,jk1,IGKJ1*01,xVVMTQSPAIMSASLGERVTMTCTAS,SSVSSSY,LHWYQQKPGSSPKLWIY,STS,NLASGVPARFSGSGSGTSYSLTISSMEAEDAATYYC,HQYHRSLGT,FGAGTKLEI,xVVMTQSPAIMSASLGERVTMTCTASSSVSSSYLHWYQQKPGSSPKLWIYSTSNLASGVPARFSGSGSGTSYSLTISSMEAEDAATYYCHQYHRSLGTFGAGTKLEI
L3A6C-VL,No end of CDR3 found!,musIGKV111,IGKV17-121*01,---,---,jk1,IGKJ1*01,EIVMTQTPASLSMAIGEKVTIRCITS,TDIDDD,MNWYQQKPGEPPNLLIS,EDN,TLRPGVPSRFSSSGYGTDFVFTIENMLSEDAADYYC,LQSDNLPLDVRRRE,---,EIVMTQTPASLSMAIGEKVTIRCITSTDIDDDMNWYQQKPGEPPNLLISEDNTLRPGVPSRFSSSGYGTDFVFTIENMLSEDAADYYCLQSDNLPLDVRRRE
L3A9C-VL,Stop codon found in the CDR3 region! No end of CDR3 found!,musIGKV097,IGKV1-135*01,---,---,jk1,IGKJ1*01,DVVLTQTPLTLSVTIGQPASISCKSS,QSLLDSDGKTY,LNWLLQRPGQSPKRLIY,QVS,KLDSGVPDRFTGSGSGTDFTLKISRVEAEDLGVYYC,WQGT*LRSVVAQNWR,---,DVVLTQTPLTLSVTIGQPASISCKSSQSLLDSDGKTYLNWLLQRPGQSPKRLIYQVSKLDSGVPDRFTGSGSGTDFTLKISRVEAEDLGVYYCWQGT*LRSVVAQNWR
L3B5C-VL,,musIGKV210,IGKV3-2*01,---,---,jk5,IGKJ5*01,DVVLTQTPASLAVSLGQRATISCRAS,ESVDNYGISF,MNWFQQKPGQPPKLLIY,AAS,NQGSGVPARFSGSGSGTDFSLNIHPMEKDDTAMYFC,QQVRRFPDT,FGAGTRLE,DVVLTQTPASLAVSLGQRATISCRASESVDNYGISFMNWFQQKPGQPPKLLIYAASNQGSGVPARFSGSGSGTDFSLNIHPMEKDDTAMYFCQQVRRFPDTFGAGTRLE
L3C4C-VL,The second cystein is not in the right position! The used V gene is a pseudogene! ,musIGKV059,-,---,---,jk3,IGKJ3*01,IVMTQTPAIMSASLGERVTMTCTAS,SSVSSSY,LHWYQQKPGSSPKLWIY,STS,NLASGVPARFSG,---,---,IVMTQTPAIMSASLGERVTMTCTASSSVSSSYLHWYQQKPGSSPKLWIYSTSNLASGVPARFSG
L3C6C-VL,Stop codon found in the V gene! No end of CDR3 found!,musIGKV210,IGKV3-2*01,---,---,jk1,IGKJ1*01,DVVITQTTASLAVSLGQRATISCRAS,ESVDNYGISF,MNWFPTETRTATQTPHL,CCL,QPRIRGPCHV*WQWVWDRLSLNIHPMEEDDTAMYFC,QQSKEVPVNIRRRHKAGD,---,DVVITQTTASLAVSLGQRATISCRASESVDNYGISFMNWFPTETRTATQTPHLCCLQPRIRGPCHV*WQWVWDRLSLNIHPMEEDDTAMYFCQQSKEVPVNIRRRHKAGD
L3D5C-VL,No end of CDR3 found!,musIGKV154,IGKV4-74*01,---,---,jk1,IGKJ1*01,EVVITQTPAIMSASLGERVTMTCTAS,SSVSSSY,LHWYQQKPGSSPKLWIY,STS,NLASGVPARFSGSGSGTSYSLTISSMEAEDAATYYC,HQYHRSTHVRWGHKAGD,---,EVVITQTPAIMSASLGERVTMTCTASSSVSSSYLHWYQQKPGSSPKLWIYSTSNLASGVPARFSGSGSGTSYSLTISSMEAEDAATYYCHQYHRSTHVRWGHKAGD
L3D11C-VL,No end of CDR3 found!,musIGKV154,IGKV4-74*01,---,---,jk2,IGKJ2*01,xIVLTQTTAIMSASLGERVTMTCTAS,SSVSSSY,LHWYQQKPGSSPKLWIY,STS,NLASGVPARFSGSGSGTSYSLTISSMEAEDAATYYC,HQYHRSPGHVRRRDKTGN,---,xIVLTQTTAIMSASLGERVTMTCTASSSVSSSYLHWYQQKPGSSPKLWIYSTSNLASGVPARFSGSGSGTSYSLTISSMEAEDAATYYCHQYHRSPGHVRRRDKTGN
L3E2C-VL,No end of CDR3 found!,musIGKV154,IGKV4-74*01,---,---,jk1,IGKJ1*01,DVVMTQTTAIMSASLGERVTMTCTAS,SSVSSSY,LHWYQQKPGSSPKLWIY,STS,NLASGVPARFSGSGSGTSYSLTISSMEAEDAATYYC,HQYHRSPPDIRRRHKTGN,---,DVVMTQTTAIMSASLGERVTMTCTASSSVSSSYLHWYQQKPGSSPKLWIYSTSNLASGVPARFSGSGSGTSYSLTISSMEAEDAATYYCHQYHRSPPDIRRRHKTGN
L3E4C-VL,,musIGKV209,IGKV3-3*01,---,---,jk2,IGKJ2*01,EIVITQSPASLAVSLGQRATIFCRAS,QSVDYNGISY,MHWFQQKPGQPPKLLIY,AAS,NLESGIPARFSGSGSGTDFTLNIHPVEEEDAATYYC,QQSIEDPYT,FGGGTKLEI,EIVITQSPASLAVSLGQRATIFCRASQSVDYNGISYMHWFQQKPGQPPKLLIYAASNLESGIPARFSGSGSGTDFTLNIHPVEEEDAATYYCQQSIEDPYTFGGGTKLEI
L3E6C-VL,,musIGKV097,IGKV1-135*01,---,---,jk1,IGKJ1*01,KSVMTQTPLTLSVTIGQPASISCKSS,QSLLDSDGKTY,LNWLLQRPGQSPKRLIY,LVS,KLDSGVPDRFTGSGSGTDFTLKISRVEAEDLGVYYC,WQGTHFPVT,FGAGTRLEI,KSVMTQTPLTLSVTIGQPASISCKSSQSLLDSDGKTYLNWLLQRPGQSPKRLIYLVSKLDSGVPDRFTGSGSGTDFTLKISRVEAEDLGVYYCWQGTHFPVTFGAGTRLEI
L3G7c-VL,,musIGKV154,IGKV4-74*01,---,---,jk4 (same score: jk3),IGKJ4*01 (same score: IGKJ3*01),DIVLTQTTAIMSASLGERVTMTCTAS,SSVSSSY,LHWYQQKPGSSPKLWIY,STS,NLASGVPARFSGSGSGTSYSLTISSMEAEDAATYYC,HQYHRSPDT,FGAGTRLEI,DIVLTQTTAIMSASLGERVTMTCTASSSVSSSYLHWYQQKPGSSPKLWIYSTSNLASGVPARFSGSGSGTSYSLTISSMEAEDAATYYCHQYHRSPDTFGAGTRLEI
L3G11C-VL,,musIGKV154,IGKV4-74*01,---,---,jk4 (same score: jk3),IGKJ4*01 (same score: IGKJ3*01),EIVMTQSTAIMSASLGERVTMTCTAS,SSVSSSY,LHWYQQKPGSSPKLWIY,STY,NLASGVPARFSGSGSGTSHSLTISSMEAEDAATYYC,HQYHRSPFT,FGEGTRLE,EIVMTQSTAIMSASLGERVTMTCTASSSVSSSYLHWYQQKPGSSPKLWIYSTYNLASGVPARFSGSGSGTSHSLTISSMEAEDAATYYCHQYHRSPFTFGEGTRLE
Nucleotide Table in comma-separated values file format (file extension: .csv)
Name:,Notes / Problems:,V-Gene (VBASE2):,V-Gene (IMGT):,D-Gene (VBASE2):,D-Gene (IMGT):,J-Gene (VBASE2):,J-Gene (IMGT):,V-FR1:,V-CDR1:,V-FR2:,V-CDR2:,V-FR3:,V-CDR3:,P1-CDR3:,N1-CDR3:,P2-CDR3:,D-CDR3:,P3-CDR3:,N2-CDR3:,P4-CDR3:,J-CDR3:,J-FR4:
L3H11A-VL,No end of CDR3 found!,musIGKV154,IGKV4-74*01,---,---,jk3,IGKJ3*01,GATGTCGTGCTCACACAGACTACAGCAATCATGTCTGCATCTCTAGGGGAACGGGTCACCATGACCTGCACTGCCAGC,TCAAGTGTAAGTTCCAGTTAC,TTGCACTGGTACCAGCAGAAGCCAGGATCCTCCCCCAAACTCTGGATTTAT,AGCACATCC,AACCTGGCTTCTGGAGTCCCAGCTCGCTTCAGTGGCAGTGGGTCTGGGACCTCTTACTCTTTCACAATCAGCAGCATGGAGGCTGAAGATGCTGCCACTTATTACTGC,TGCCACCAGTATCATCGTTC,---,TCCTCGCA,,,,,---,ACATTCGGC…
L3A8B-VL,,musIGKV154,IGKV4-74*01,---,---,jk1,IGKJ1*01,GACGTCGTTCTGACACAGACTACAGCAATCATGTCTGCATCTCTAGGGGAACGGGTCACCATGACCTGCACTGCCAGC,TCTAGTGTAAGTTCCAGTTAC,TTGCACTGGTACCAGCAGAAGCCAGGATCCTCCCCCAAACTCTGGATTTAT,AGCACATCC,AACCTGGCTTCTGGAGTCCCAGCTCGCTTCAGTGGCAGTGGGTCTGGGACCTCTTACTCTCTCACAATCAGCAGCATGGAGGCTGAAGACGCTGCCGCTTATTACTGC,CAGCAGTATCATAGTTAC,---,CCCCCCGA,,,,,T,ACG,TTCGGCGGGGGCACCAAACTGGAGATC
L3B10B-VL,,musIGKV154,IGKV4-74*01,---,---,jk1,IGKJ1*01,GAGTTGTGATGACCCAGTCTCCAGCAATCATGTCTGCATCTCTAGGGGAACGGGTCACCATGACCTGCACTGCCAGC,TCAAGTGTAAGTTCCAGTTAC,TTGCACTGGTACCAGCAGAAGCCAGGATCCTCCCCCAAACTCTGGATTTAT,AGCACATCC,AACCTGGCTTCTGGAGTCCCAGCTCGCTTCAGTGGCAGTGGGTCTGGGACCTCTTACTCTCTCACAATCAGCAGCATGGAGGCTGAAGATGCTGCCACTTATTACTGC,CACCAGTATCATCGTTCC,---,CTTGGC,,,,,---,ACG,TTCGGCGCAGGCACCAAACTGGAAAT
L3A6C-VL,No end of CDR3 found!,musIGKV111,IGKV17-121*01,---,---,jk1,IGKJ1*01,GAAATCGTTATGACCCAAACTCCAGCATCCCTGTCCATGGCTATAGGAGAAAAAGTCACCATCAGATGCATAACCAGC,ACTGATATTGATGATGAT,ATGAACTGGTACCAGCAGAAGCCAGGGGAACCTCCTAATCTCCTTATTTCA,GAAGACAAT,ACTCTTCGTCCTGGAGTCCCATCCCGATTCTCCAGCAGTGGCTATGGTACAGATTTTGTTTTTACAATTGAAAACATGCTCTCAGAAGATGCTGCAGATTACTACTGT,TGTTTGCAAAGCGATAACTTG,C,CTTTA,,,,,---,GACGTTCGGCGGAGG…
L3A9C-VL,Stop codon found in the CDR3 region! No end of CDR3 found!,musIGKV097,IGKV1-135*01,---,---,jk1,IGKJ1*01,GATGTCGTTCTGACACAAACTCCACTCACTTTGTCGGTTACCATTGGACAACCAGCCTCCATCTCTTGCAAGTCAAGT,CAGAGCCTCTTAGATAGTGATGGAAAGACATAT,TTGAATTGGTTGTTACAGAGGCCAGGCCAGTCTCCAAAGCGCCTAATCTAT,CAGGTGTCT,AAACTGGACTCTGGAGTCCCTGACAGGTTCACTGGCAGTGGATCAGGGACAGATTTCACACTGAAAATCAGCAGAGTGGAGGCTGAGGATTTGGGAGTTTATTATTGC,TG…
L3B5C-VL,,musIGKV210,IGKV3-2*01,---,---,jk5,IGKJ5*01,GATGTCGTTCTGACACAAACTCCAGCTTCTTTGGCTGTGTCTCTAGGGCAAAGGGCCACCATCTCCTGCAGAGCCAGC,GAAAGTGTTGATAATTATGGCATTAGTTTT,ATGAACTGGTTCCAACAGAAACCAGGACAGCCACCCAAACTCCTCATCTAT,GCTGCATCC,AACCAAGGATCCGGGGTCCCTGCCAGGTTTAGTGGCAGTGGGTCTGGGACAGACTTCAGCCTCAACATCCATCCTATGGAGAAGGATGATACTGCAATGTATTTCTGT,CAGCAA,---,GTAAGGAGGTTCCCTGA,,,,,---,CACG,TTCGGCGCTGGGACCAGGTTGGAG
L3C4C-VL,The second cystein is not in the right position! The used V gene is a pseudogene! ,musIGKV059,-,---,---,jk3,IGKJ3*01,ATTGTGATGACCCAAACTCCAGCAATCATGTCTGCATCTCTAGGGGAACGGGTCACCATGACCTGCACTGCCAGC,TCAAGTGTAAGTTCCAGTTAC,TTGCACTGGTACCAGCAGAAGCCAGGATCCTCCCCCAAACTCTGGATTTAT,AGCACATCC,AACCTGGCTTCTGGAGTCCCAGCTCGCTTCAGTGGC,---,---,---,,,,,---,---,---
L3C6C-VL,Stop codon found in the V gene! No end of CDR3 found!,musIGKV210,IGKV3-2*01,---,---,jk1,IGKJ1*01,GACGTCGTGATCACCCAAACTACAGCTTCTTTGGCTGTGTCTCTAGGGCAGAGGGCCACCATCTCCTGCAGAGCCAGC,GAAAGTGTTGATAATTATGGCATTAGTTTT,ATGAACTGGTTCCCAACAGAAACCAGGACAGCCACCCAAACTCCTCATCTA,TGCTGCCTC,CAACCAAGGATCCGGGGTCCCTGCCACGTTTAGTGGCAGTGGGTCTGGGACAGACTCAGCCTCAACATCCATCCTATGGAGGAGGATGATACTGCAATGTATTTCTGT,TGTCAGCAAAGT…
L3D5C-VL,No end of CDR3 found!,musIGKV154,IGKV4-74*01,---,---,jk1,IGKJ1*01,GAAGTTGTGATCACCCAGACTCCAGCAATCATGTCTGCATCTCTAGGGGAACGGGTCACCATGACCTGCACTGCCAGC,TCAAGTGTAAGTTCCAGTTAC,TTGCACTGGTACCAGCAGAAGCCAGGATCCTCCCCCAAACTCTGGATTTAT,AGCACATCC,AACCTGGCTTCTGGAGTCCCAGCTCGCTTCAGTGGCAGTGGGTCTGGGACCTCTTACTCTCTCACAATCAGCAGCATGGAGGCTGAAGATGCTGCCACTTATTACTGC,TGCCACCAGTATCATCGTTCC,---,ACGC,,,,,---,ACGTTCGGTGGGG…
L3D11C-VL,No end of CDR3 found!,musIGKV154,IGKV4-74*01,---,---,jk2,IGKJ2*01,GAATCGTTCTGACACAGACTACAGCAATCATGTCTGCATCTCTAGGGGAACGGGTCACCATGACCTGCACTGCCAGC,TCAAGTGTAAGTTCCAGTTAC,TTGCACTGGTACCAGCAGAAGCCAGGATCCTCCCCCAAACTCTGGATTTAT,AGCACATCC,AACCTGGCTTCTGGAGTCCCAGCTCGCTTCAGTGGCAGTGGGTCTGGGACCTCTTACTCTCTCACAATCAGCAGCATGGAGGCTGAAGATGCTGCCACTTACTACTGC,TGCCACCAGTATCATCGTTCC,---,CCGGG,,,,,G,CACGTTCGGCGAAG…
L3E2C-VL,No end of CDR3 found!,musIGKV154,IGKV4-74*01,---,---,jk1,IGKJ1*01,GATGTCGTGATGACCCAAACTACAGCAATCATGTCTGCATCTCTAGGGGAACGGGTCACCATGACCTGCACTGCCAGC,TCAAGTGTAAGTTCCAGTTAC,TTGCATTGGTACCAGCAGAAGCCAGGATCCTCCCCCAAACTCTGGATTTAT,AGCACATCC,AACCTGGCTTCTGGAGTCCCAGCTCGCTTCAGTGGCAGTGGGTCTGGGACCTCTTACTCTCTCACAATCAGCAGCATGGAGGCTGAAGATGCTGCCACTTATTACTGC,TGCCACCAGTATCATCGTTCC,---,CCGCCT,,,,,---,GACATTCGGAG…
L3E4C-VL,,musIGKV209,IGKV3-3*01,---,---,jk2,IGKJ2*01,GAAATTGTGATCACACAGTCTCCAGCTTCTTTGGCTGTGTCTCTAGGACAGAGAGCCACTATCTTCTGCAGAGCCAGC,CAGAGTGTCGATTATAATGGAATTAGTTAT,ATGCACTGGTTCCAACAGAAACCAGGACAGCCACCCAAACTCCTCATCTAT,GCTGCATCC,AACCTAGAATCTGGGATCCCTGCCAGGTTCAGTGGCAGTGGGTCTGGGACAGACTTCACCCTCAACATCCATCCTGTGGAGGAGGAAGATGCTGCAACCTATTACTGT,CAGCAAAGTATTGAGGAT,---,C,,,,,C,GTATACG,TTCGGCGGAGGGACCAAACTGGAGATA
L3E6C-VL,,musIGKV097,IGKV1-135*01,---,---,jk1,IGKJ1*01,AAGTCGGTGATGACCCAGACTCCACTCACTTTGTCGGTTACCATTGGACAACCAGCCTCCATCTCTTGCAAGTCAAGT,CAGAGCCTCTTAGATAGTGATGGAAAGACATAT,TTGAATTGGTTGTTACAGAGGCCAGGCCAGTCTCCAAAGCGCCTAATCTAT,CTGGTGTCT,AAACTGGACTCTGGAGTCCCTGACAGGTTCACTGGCAGTGGATCAGGGACAGATTTCACACTGAAAATCAGCAGAGTGGAGGCTGAGGATTTGGGAGTTTATTATTGC,TGGCAAGGTACACATTTT,---,CCTGT,,,,,T,ACG,TTCGGTGCAGGCACCAGATTG…
L3G7c-VL,,musIGKV154,IGKV4-74*01,---,---,jk4 (same score: jk3),IGKJ4*01 (same score: IGKJ3*01),GACATTGTGCTGACCCAGACTACAGCAATCATGTCTGCATCTCTAGGGGAACGGGTCACCATGACCTGCACTGCCAGC,TCAAGTGTAAGTTCCAGTTAC,TTGCACTGGTACCAGCAGAAGCCAGGATCCTCCCCCAAACTCTGGATTTAT,AGCACATCC,AACCTGGCTTCTGGAGTCCCAGCTCGCTTCAGTGGCAGTGGGTCTGGGACCTCTTACTCTCTCACAATCAGCAGCATGGAGGCTGAAGATGCTGCCACTTATTACTGC,CACCAGTATCATCGTTCC,---,CCTGA,,,,…
L3G11C-VL,,musIGKV154,IGKV4-74*01,---,---,jk4 (same score: jk3),IGKJ4*01 (same score: IGKJ3*01),GAAATCGTTATGACCCAATCTACAGCAATCATGTCTGCATCTCTAGGGGAACGGGTCACCATGACCTGCACTGCCAGC,TCAAGTGTAAGTTCCAGTTAC,TTGCACTGGTACCAGCAGAAGCCAGGATCCTCCCCCAAACTCTGGATTTAT,AGCACATAC,AACCTGGCTTCTGGAGTCCCAGCTCGCTTCAGTGGCAGTGGGTCTGGGACCTCTCACTCTCTCACAATCAGCAGCATGGAGGCTGAAGATGCTGCCACTTATTACTGC,CACCAGTATCATCGTTCC,---,CC,,,,,A…

## Sheet: Summary V-seg Usage
Table S6: Germline V-minigene Usage
	Ig clones derived from germline DNA	anti-phOx clones derived from Lib03	anti-SCoVN clones derived from Lib04	anti-SCoVN clones derived from Lib09
(A) Mouse Ig VH
Total # of Readable Clone =	104	15	3	3
Non-mouse Ig gene =	1
Pseudo V-gene =	15
Unknown =	7	2	0	0
Germline Ig VH =	82	13	3	3
Igh-VJ558 VH1 family =	31	2	1	1
Igh-VQ52 VH2 family =	10			1
Igh-V7183 VH5 family =	4
Igh-VJ606 VH6 family =	5	7	1
Igh-S107 VH7 family =	29
Igh-VSM7 VH14 family =	2	2	1	1
Igh-V15 VH15 family =		2
(B) Mouse Ig VLK
Total # of Readable Clone =	84	15	3	3
Pseudo V-gene =	1
Unknown =	0	0	0	0
Germline Ig VLK =	83	15	3	3
IGKV21 subgroup =	59	3	3	2
IGKV4/5 subgroup =	14	9		1
IGKV2 subgroup =	9	2
IGKV9/10 subgroup =	1	1
